# Supplementary material for: Manganese is a physiologically relevant TORC1 activator in yeast and mammals
Source: PubMed Central journal article supplement (PMC9337852; doi:10.7554/elife.80497), 2022-07-29

## Figure 2A and 2C

### EXPT1-Atg8-Om45

Samples loaded:

WT *ATG8-GFP* 0, 1, 2, 4 and 6h; *pmr1* $\Delta$  *ATG8-GFP* 0, 1, 2, 4 and 6h; blank; WT *GFP-OM45* 0, 1, 2, 4 and 6h; *pmr1* $\Delta$  *GFP-OM45* 0, 1, 2, 4 and 6h.

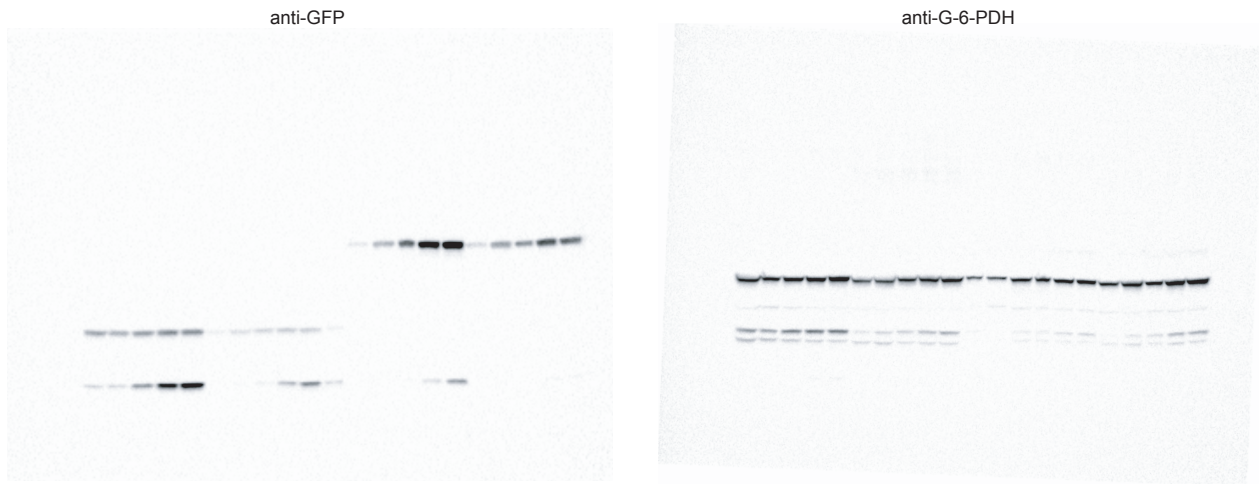

### EXPT2-Atg8

Samples loaded:

WT *ATG8-GFP* 0, 1, 2, 4 and 6h; *pmr1* $\Delta$  *ATG8-GFP* 0, 1, 2, 4 and 6h; *smf2* $\Delta$  *ATG8-GFP* 0, 1, 2, 4 and 6h; *pmr1* $\Delta$  *smf2* $\Delta$  *ATG8-GFP* 0, 1, 2, 4 and 6h.

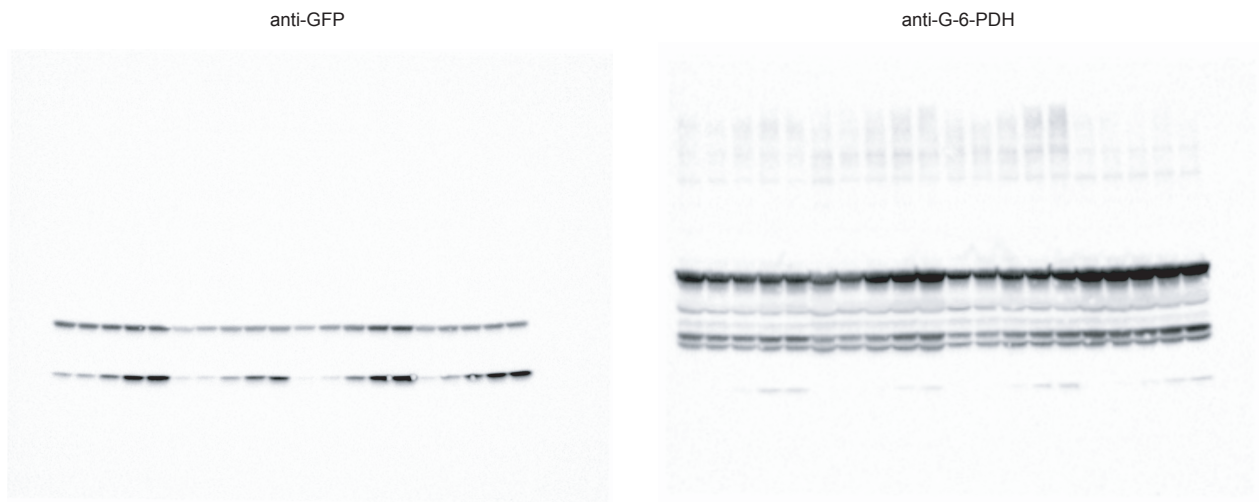

### EXPT2-Om45

Samples loaded:

WT *GFP-OM45* 0, 1, 2, 4 and 6h; *pmr1* $\Delta$  *GFP-OM45* 0, 1, 2, 4 and 6h; *smf2* $\Delta$  *GFP-OM45* 0, 1, 2, 4 and 6h; *pmr1* $\Delta$  *smf2* $\Delta$  *GFP-OM45* 0, 1, 2, 4 and 6h.

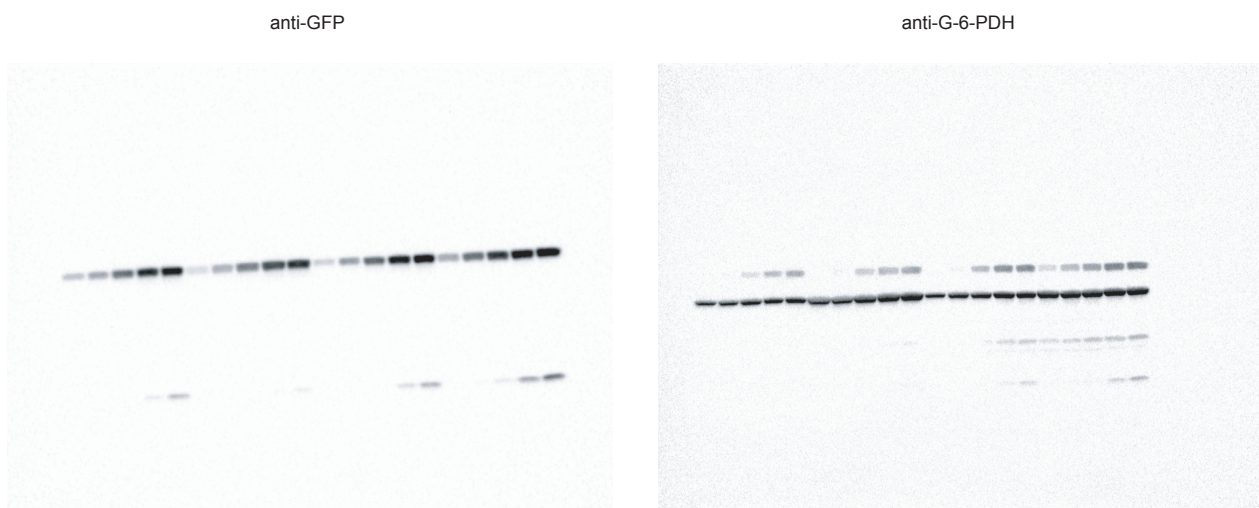

### EXPT3-Atg8

Samples loaded:

WT *ATG8-GFP* 0, 2, 4 and 6h; *pmr1* $\Delta$  *ATG8-GFP* 0, 2, 4 and 6h; *smf2* $\Delta$  *ATG8-GFP* 0, 2, 4 and 6h; *pmr1* $\Delta$  *smf2* $\Delta$  *ATG8-GFP* 0, 2, 4 and 6h; *smf2* $\Delta$  *ATG8-GFP bis* 0, 2, 4 and 6h; *pmr1* $\Delta$  *smf2* $\Delta$  *ATG8-GFP bis* 0, 2, 4 and 6h.

The samples highlighted in blue are those shown in Figure 2A.

anti-GFP, right part of blot

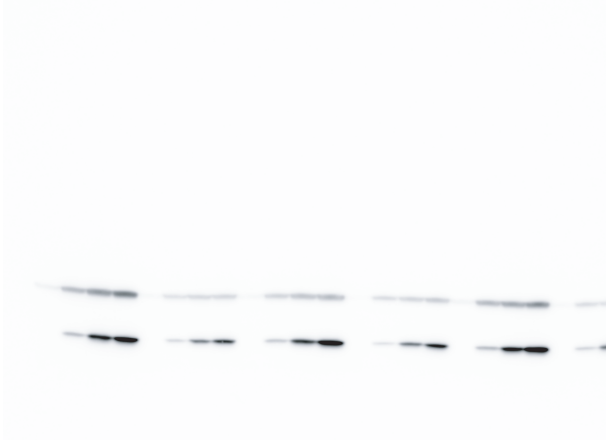

anti-GFP, left part of blot

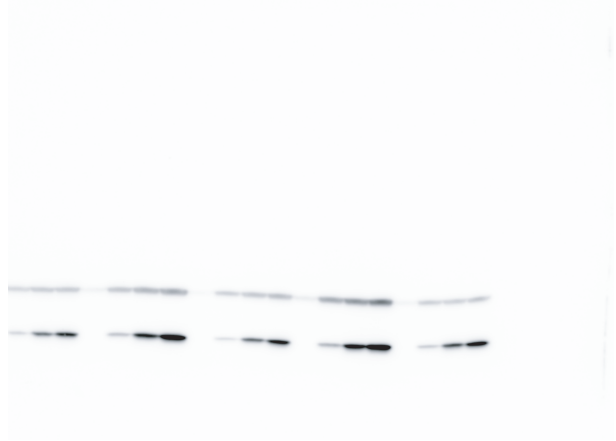

anti-G-6-PDH, right part of blot

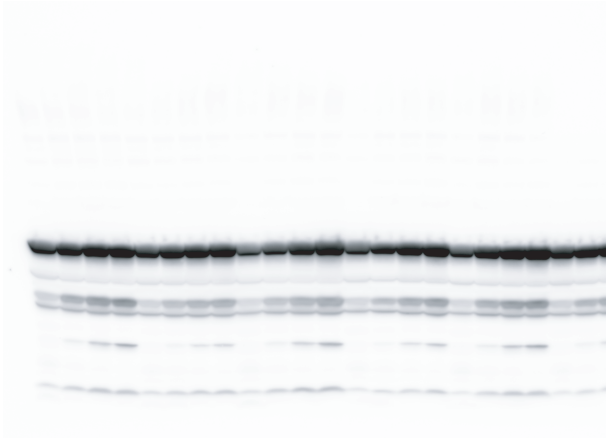

anti-G-6-PDH, left part of blot

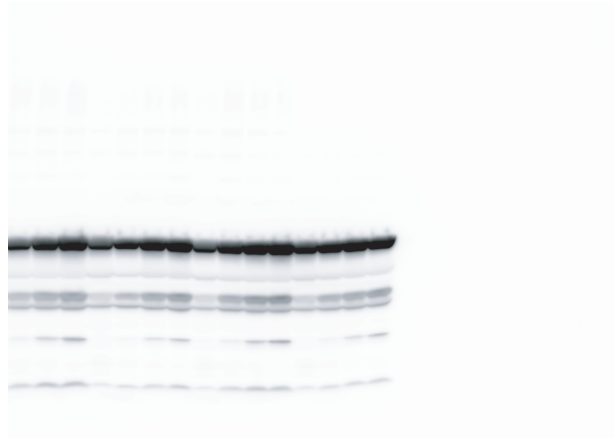

### EXPT3-Om45

Samples loaded:

WT *GFP-OM45* 0, 2, 4 and 6h; *pmr1* $\Delta$  *GFP-OM45* 0, 2, 4 and 6h; *smf2* $\Delta$  *GFP-OM45* 0, 2, 4 and 6h; *pmr1* $\Delta$  *smf2* $\Delta$  *GFP-OM45* 0, 2, 4 and 6h; blank; *smf2* $\Delta$  *GFP-OM45 bis* 0, 2, 4 and 6h; *pmr1* $\Delta$  *smf2* $\Delta$  *GFP-OM45 bis* 0, 2, 4 and 6h.

The samples highlighted in blue are those shown in Figure 2C.

anti-GFP, right part of blot

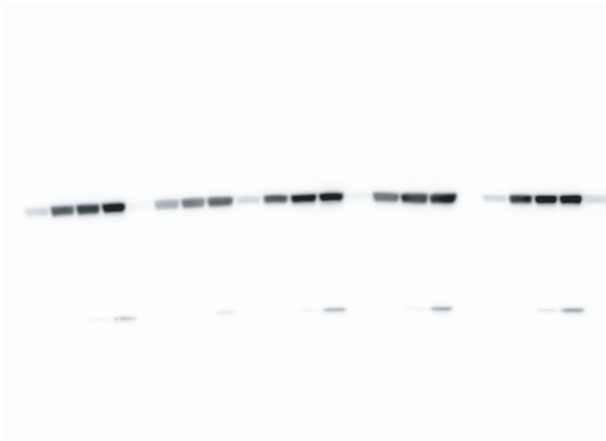

anti-GFP, left part of blot

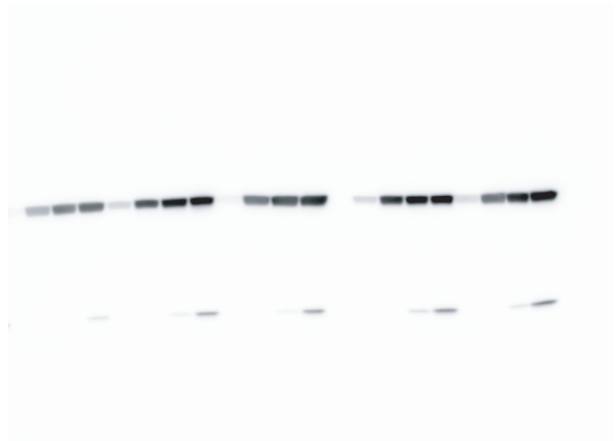

anti-G-6-PDH, right part of blot

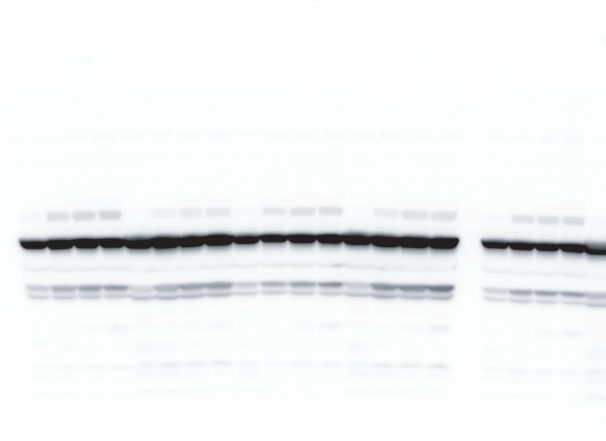

anti-G-6-PDH, left part of blot

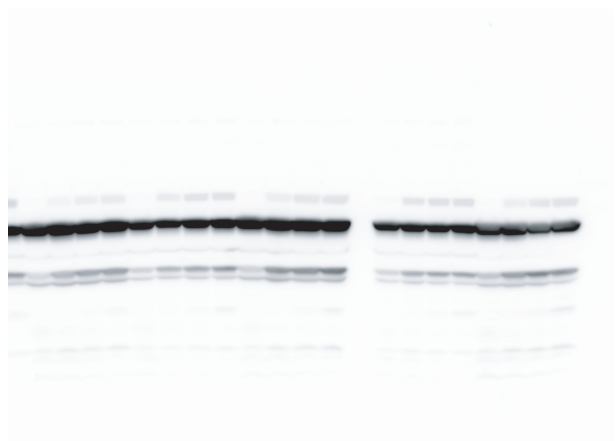

**EXPT4-Atg8**

Samples loaded:

WT *ATG8-GFP* 0, 1, 2, 4 and 6h; *pmr1* $\Delta$  *ATG8-GFP* 0, 1, 2, 4 and 6h; *smf2* $\Delta$  *ATG8-GFP* 0, 1, 2, 4 and 6h; *pmr1* $\Delta$  *smf2* $\Delta$  *ATG8-GFP* 0, 1, 2, 4 and 6h.

anti-GFP

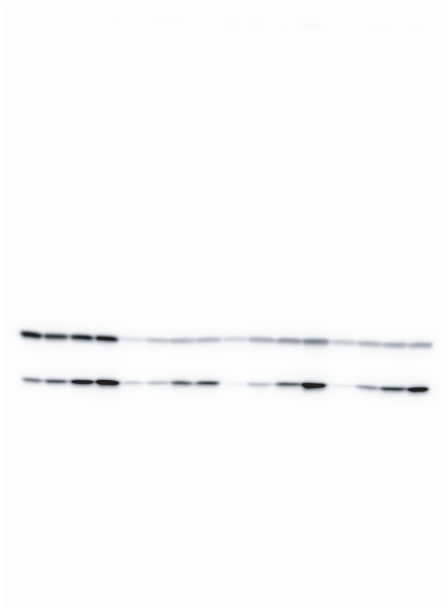

anti-G-6-PDH

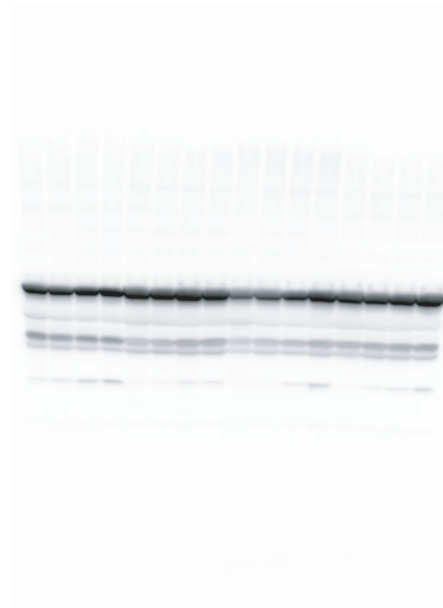

## Figure 2F

### EXPT1-EXPT2

Samples loaded:

WT *RTG3-GFP* 0, 15, and 30 min; *pmr1* $\Delta$  *RTG3-GFP* 0, 15, and 30 min; *smf2* $\Delta$  *RTG3-GFP* 0, 15, and 30 min; *pmr1* $\Delta$  *smf2* $\Delta$  *RTG3-GFP* 0, 15, and 30 min (exp1)  
WT *RTG3-GFP* 0, 15, and 30 min; *pmr1* $\Delta$  *RTG3-GFP* 0, 15, and 30 min; *smf2* $\Delta$  *RTG3-GFP* 0, 15, and 30 min; *pmr1* $\Delta$  *smf2* $\Delta$  *RTG3-GFP* 0, 15, and 30 min (exp2)  
The samples highlighted in blue are those shown in Figure 2F.

anti-GFP, left part of blot

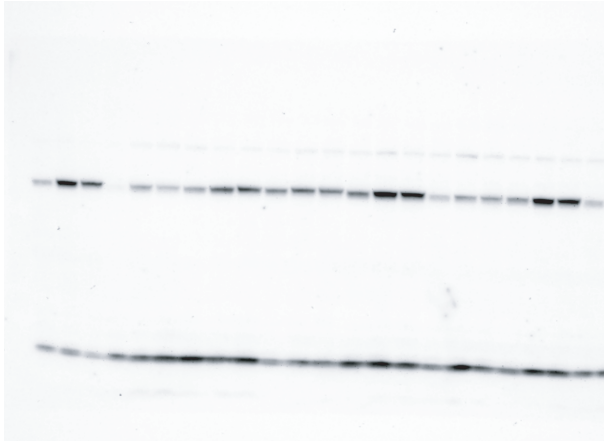

anti-GFP, right part of blot

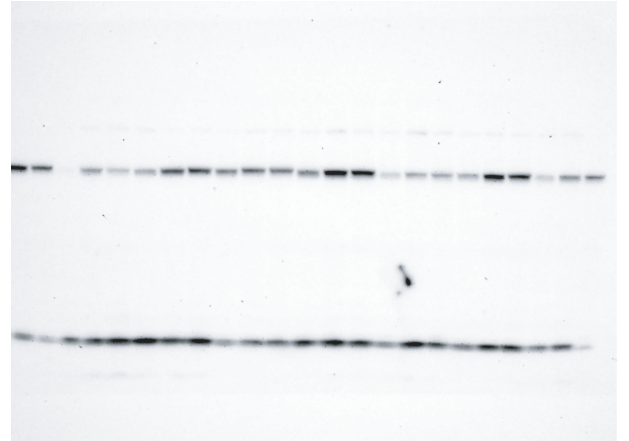

anti-G-6-PDH, left part of blot

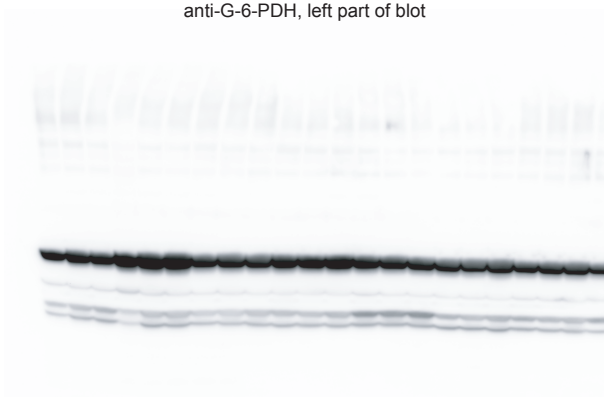

anti-G-6-PDH, right part of blot

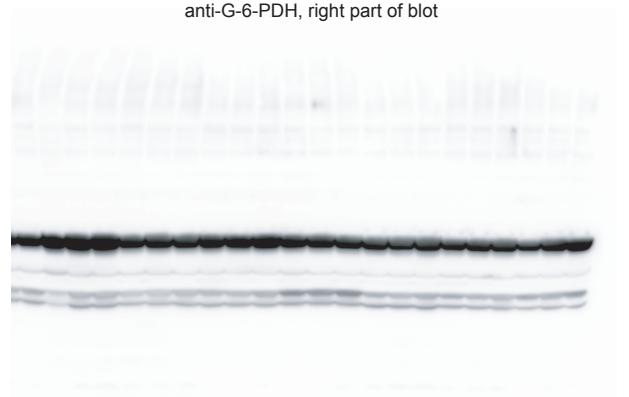

### EXPT3

Samples loaded:

WT *RTG3-GFP* 0, 15, and 30 min; *pmr1* $\Delta$  *RTG3-GFP* 0, 15, and 30 min; *smf2* $\Delta$  *RTG3-GFP* 0, 15, and 30 min; *pmr1* $\Delta$  *smf2* $\Delta$  *RTG3-GFP* 0, 15, and 30 min.

anti-GFP

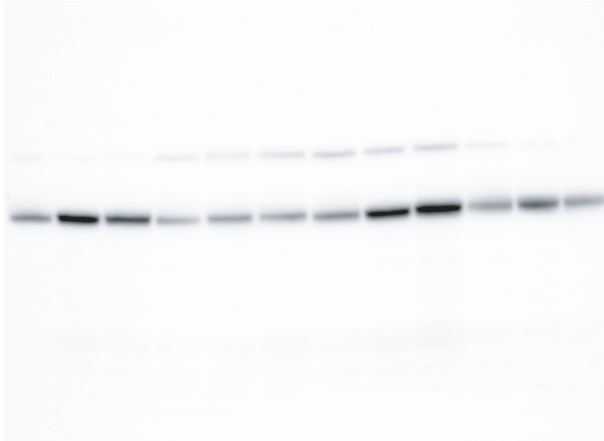

anti-G-6-PDH

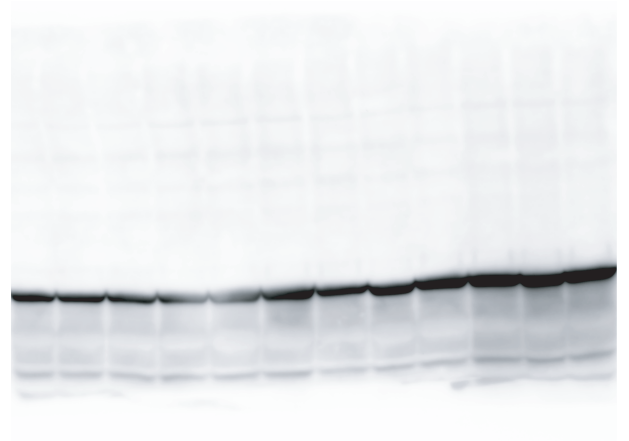

### EXPT4

Samples loaded:

WT *RTG3-GFP* 0, 15, and 30 min; *pmr1* $\Delta$  *RTG3-GFP* 0, 15, and 30 min; *smf2* $\Delta$  *RTG3-GFP* 0, 15, and 30 min; *pmr1* $\Delta$  *smf2* $\Delta$  *RTG3-GFP* 0, 15, and 30 min.

anti-GFP

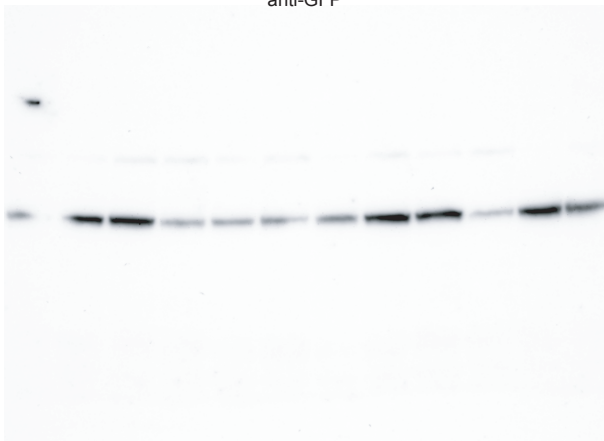

anti-G-6-PDH

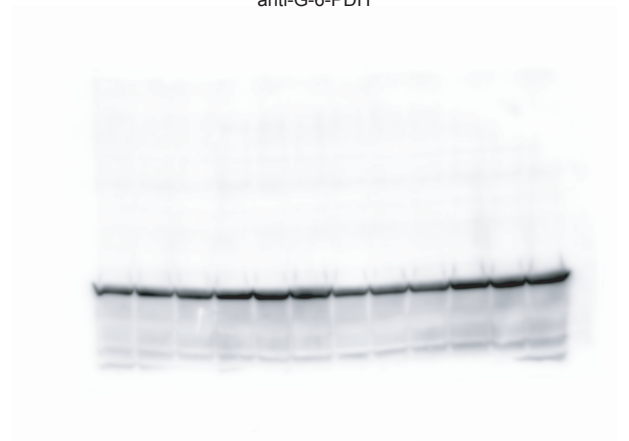

Supplement: elife-80497-fig2-data2.pdf [file elife-80497-fig2-data2.pdf]
