# Supplementary material for: Manganese is a physiologically relevant TORC1 activator in yeast and mammals
Source: PubMed Central journal article supplement (PMC9337852; doi:10.7554/elife.80497), 2022-07-29

### Figure 3A

Exp1.

Samples loaded:

MgCl<sub>2</sub> (μM)

640 320 160 80 40 20

MnCl<sub>2</sub> (μM)

640 320 160 80 40 20

Sypro Ruby Staining

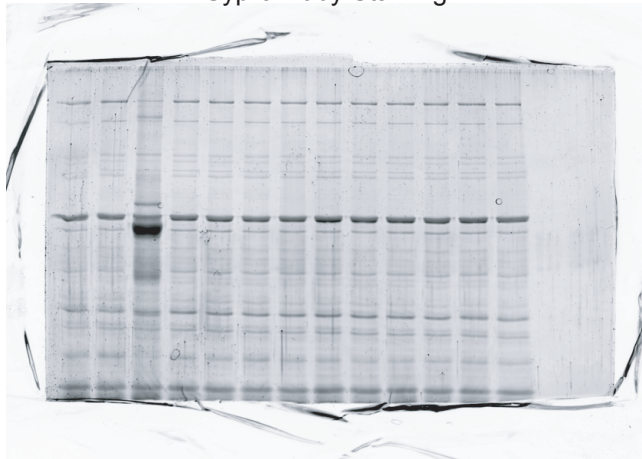

Autoradiography

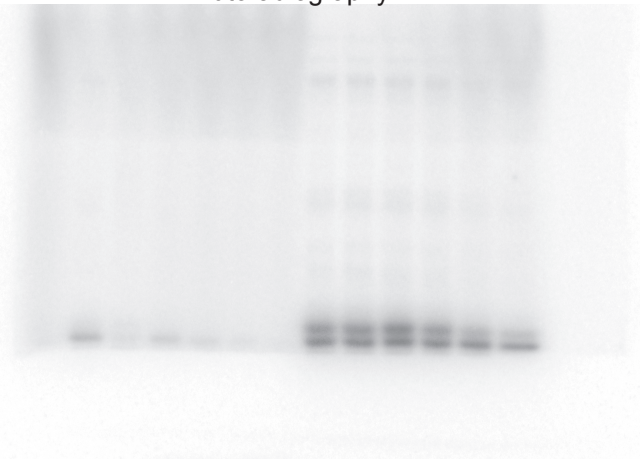

Exp2. Data shown in Figure 3A

Samples loaded:

MgCl<sub>2</sub> (μM)

640 320 160 80 40 20

MnCl<sub>2</sub> (μM)

640 320 160 80 40 20

Sypro Ruby Staining

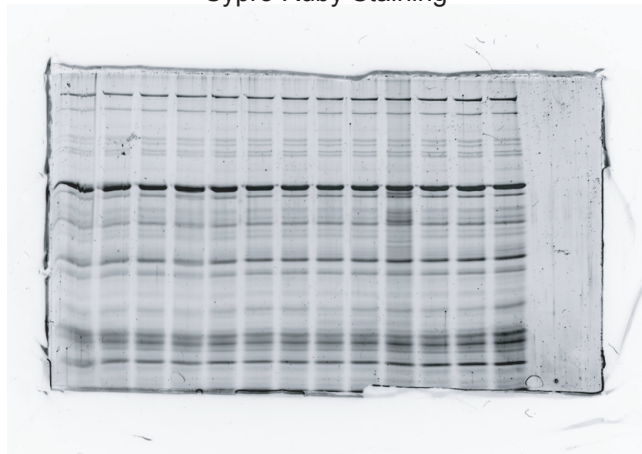

Autoradiography

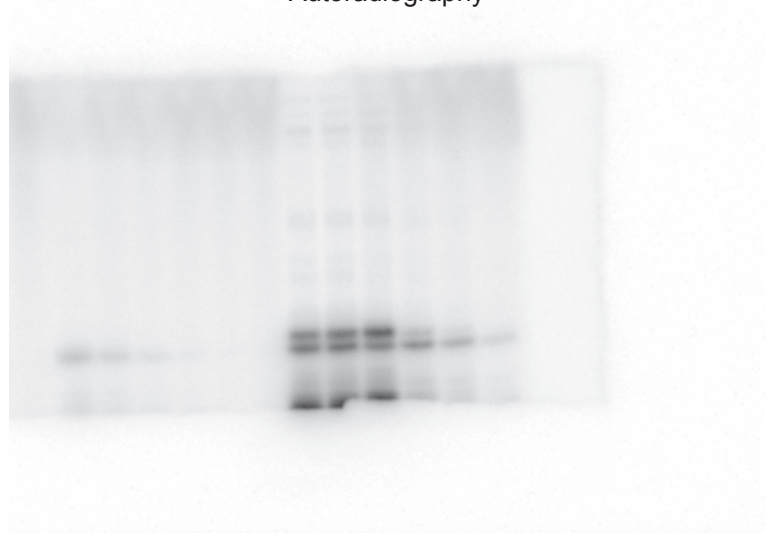

Exp3.

Samples loaded:

MgCl<sub>2</sub> (μM)

20 40 80 160 320 640

MnCl<sub>2</sub> (μM)

20 40 80 160 320 640

Sypro Ruby Staining

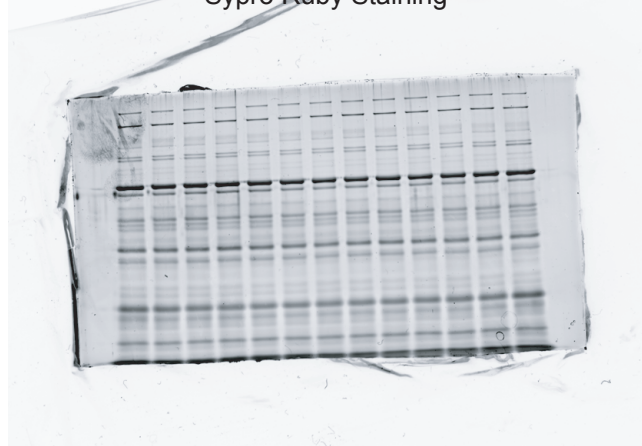

Autoradiography

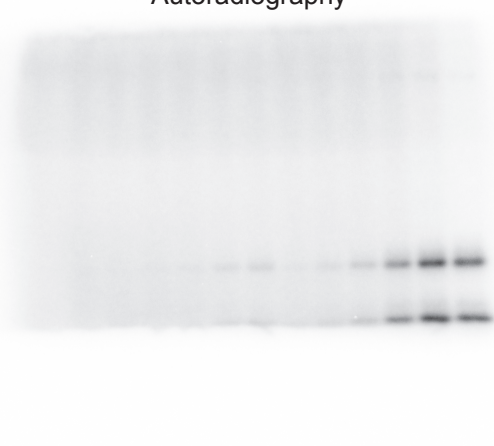

## Figure 3C

Exp1. Data shown in Figure 3C.

Samples loaded:

|                                  |     |    |    |                                     |     |     |    |                                                             |     |     |     |    |    |     |
|----------------------------------|-----|----|----|-------------------------------------|-----|-----|----|-------------------------------------------------------------|-----|-----|-----|----|----|-----|
| MgCl <sub>2</sub> 4 mM, ATP (μM) |     |    |    | MnCl <sub>2</sub> 0.16 mM, ATP (μM) |     |     |    | MgCl <sub>2</sub> 4 mM, MnCl <sub>2</sub> 0.16 mM, ATP (μM) |     |     |     |    |    |     |
| 1,2                              | 3,6 | 11 | 33 | 100                                 | 1,2 | 3,6 | 11 | 33                                                          | 100 | 1,2 | 3,6 | 11 | 33 | 100 |

Sypro Ruby Staining

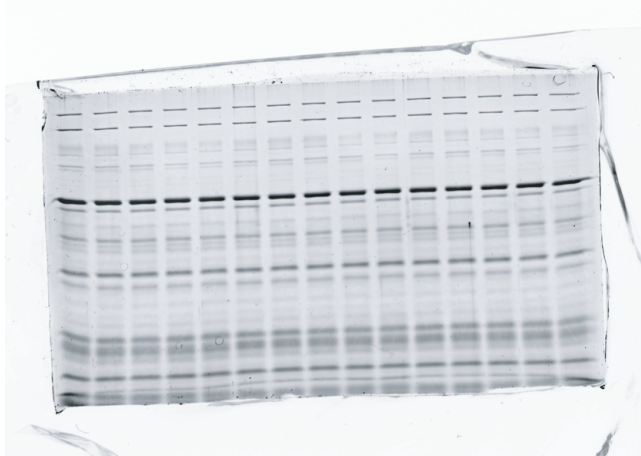

Autoradiography

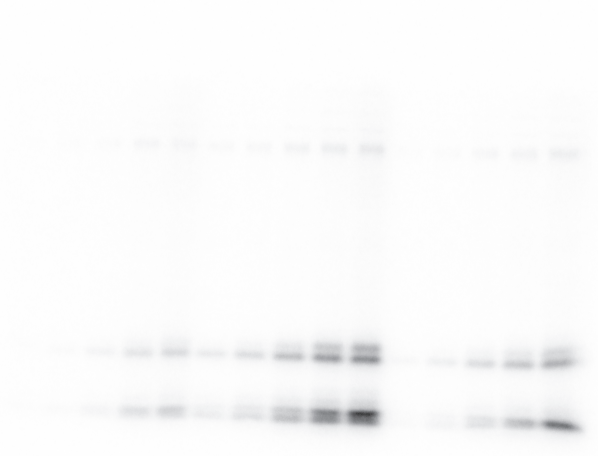

Exp2.

Samples loaded:

|                                  |     |    |    |                                     |     |     |    |                                                             |     |     |     |    |    |     |
|----------------------------------|-----|----|----|-------------------------------------|-----|-----|----|-------------------------------------------------------------|-----|-----|-----|----|----|-----|
| MgCl <sub>2</sub> 4 mM, ATP (μM) |     |    |    | MnCl <sub>2</sub> 0.16 mM, ATP (μM) |     |     |    | MgCl <sub>2</sub> 4 mM, MnCl <sub>2</sub> 0.16 mM, ATP (μM) |     |     |     |    |    |     |
| 1,2                              | 3,6 | 11 | 33 | 100                                 | 1,2 | 3,6 | 11 | 33                                                          | 100 | 1,2 | 3,6 | 11 | 33 | 100 |

Sypro Ruby Staining

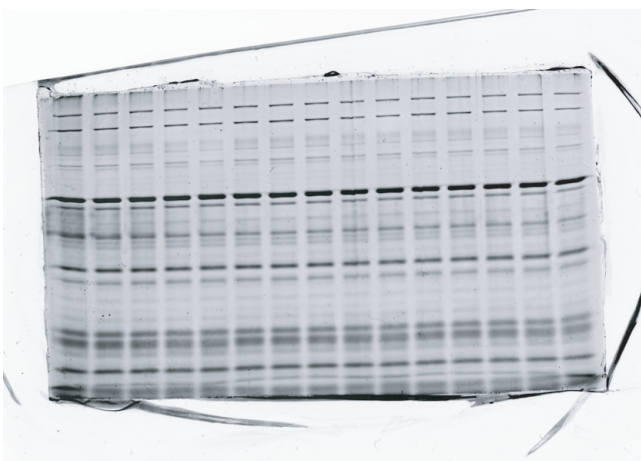

Autoradiography

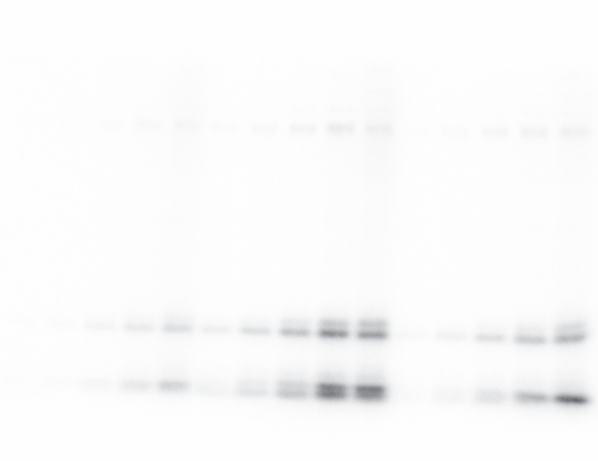

Exp3.

Samples loaded:

|                                                             |     |    |    |     |                                     |     |    |    |     |                                  |     |    |    |     |
|-------------------------------------------------------------|-----|----|----|-----|-------------------------------------|-----|----|----|-----|----------------------------------|-----|----|----|-----|
| MgCl <sub>2</sub> 4 mM, MnCl <sub>2</sub> 0.16 mM, ATP (μM) |     |    |    |     | MnCl <sub>2</sub> 0.16 mM, ATP (μM) |     |    |    |     | MgCl <sub>2</sub> 4 mM, ATP (μM) |     |    |    |     |
| 1,2                                                         | 3,6 | 11 | 33 | 100 | 1,2                                 | 3,6 | 11 | 33 | 100 | 1,2                              | 3,6 | 11 | 33 | 100 |

Sypro Ruby Staining

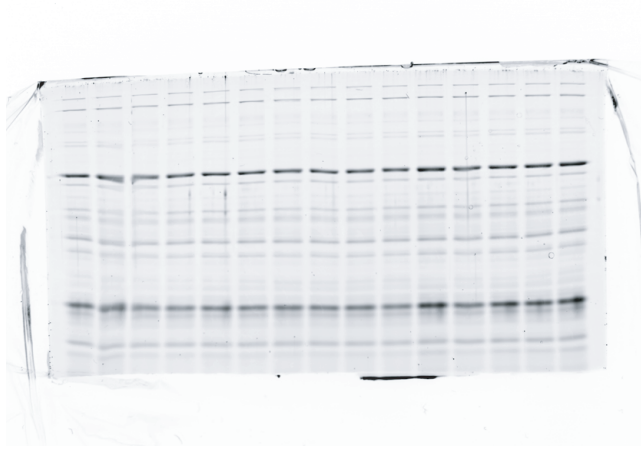

Autoradiography

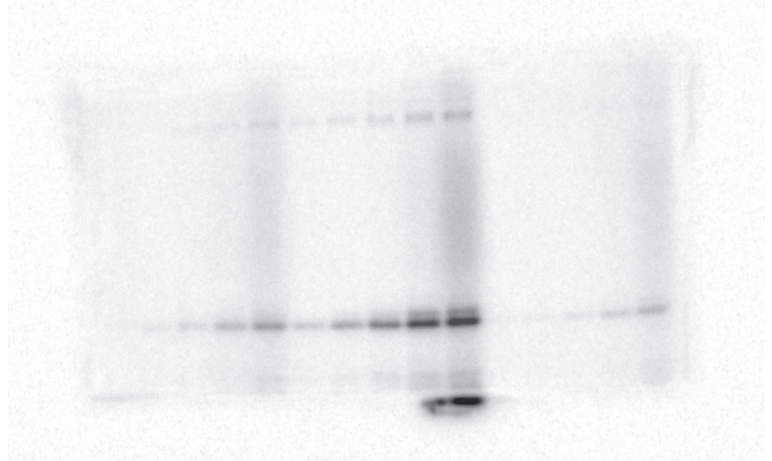

Expt4.

Samples loaded:

MgCl<sub>2</sub> 4 mM, ATP (μM)

1,2 3,6 11 33 100 300 600

MnCl<sub>2</sub> 4 mM, ATP (μM)

1,2 3,6 11 33 100 300 600

The 300 and 600 μM samples were not quantified.

Sypro Ruby Staining

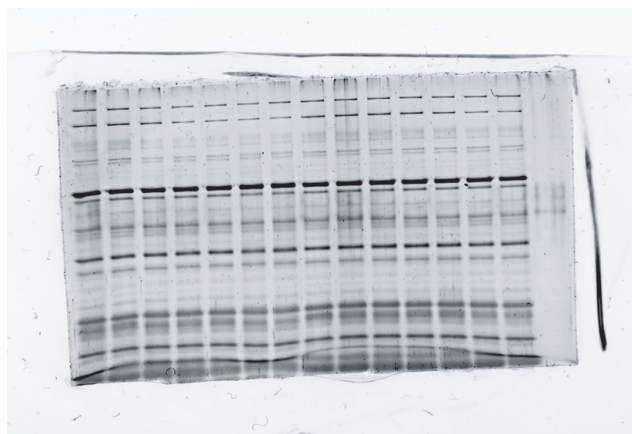

Autoradiography

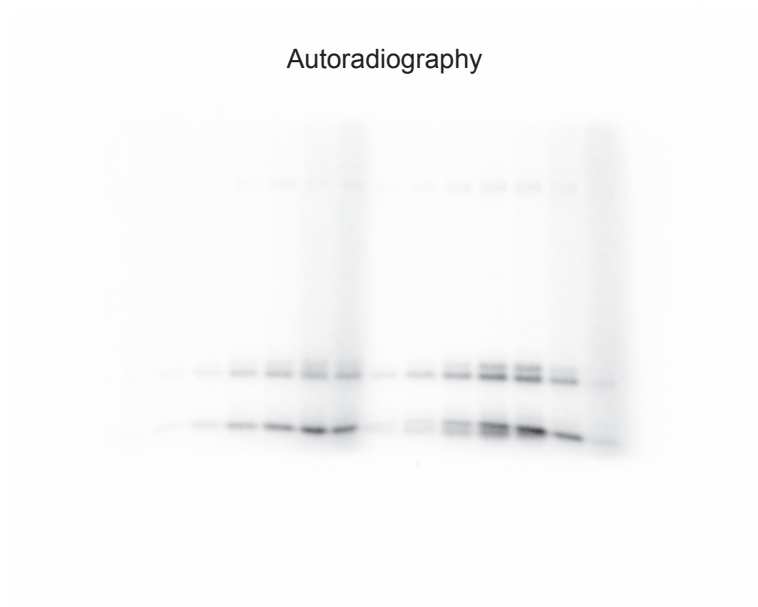

Supplement: elife-80497-fig3-data2.pdf [file elife-80497-fig3-data2.pdf]
