# Supplementary material for: Manganese is a physiologically relevant TORC1 activator in yeast and mammals
Source: PubMed Central journal article supplement (PMC9337852; doi:10.7554/elife.80497), 2022-07-29

**Figure 5A**

Samples loaded:

U2OS: +AA; 0, 0.05, 0.1, 0.25, 0.5, 1 mM MnCl<sub>2</sub>

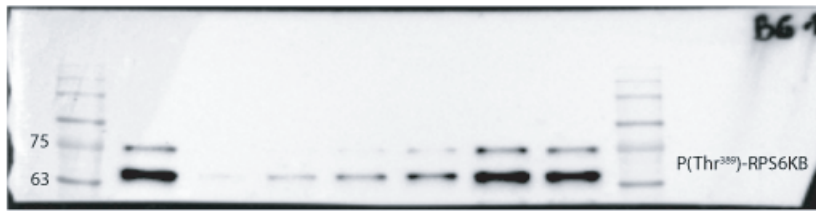

P(Thr<sup>389</sup>)-RPS6KB

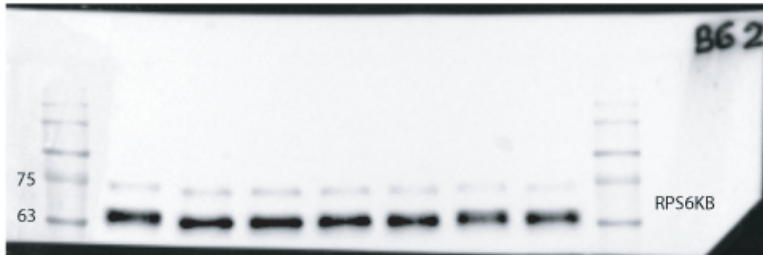

RPS6KB

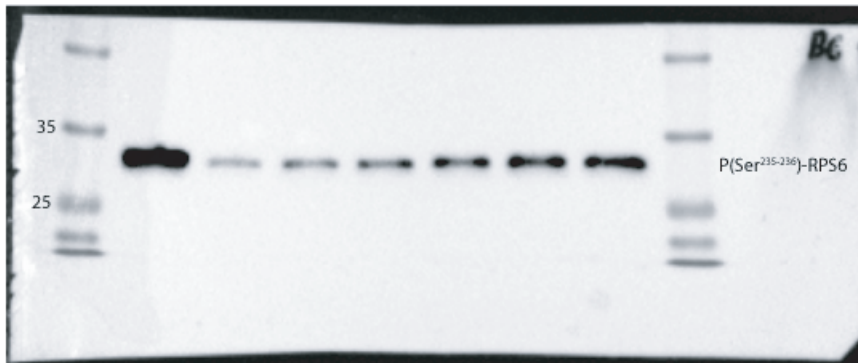

P(Ser<sup>235-236</sup>)-RPS6

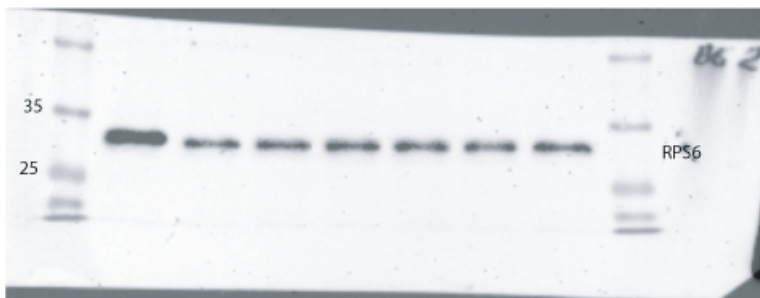

RPS6

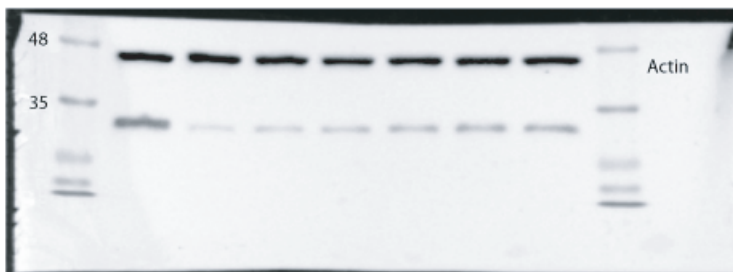

Actin

**Figure 5B**

Samples loaded:

HEK293T: +AA; 0, 0.05, 0.1, 0.25, 0.5, 1 mM MnCl<sub>2</sub>

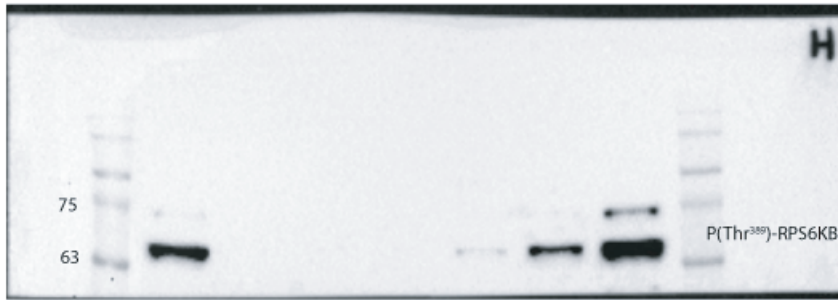

P(Thr<sup>389</sup>)-RPS6KB

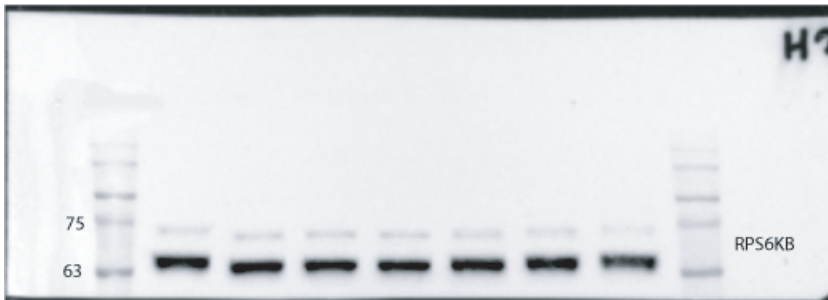

RPS6KB

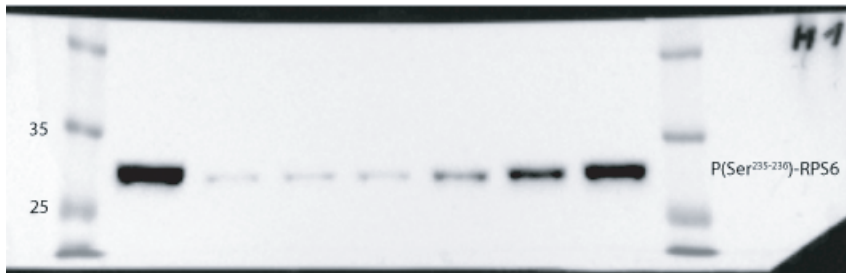

P(Ser<sup>235-236</sup>)-RPS6

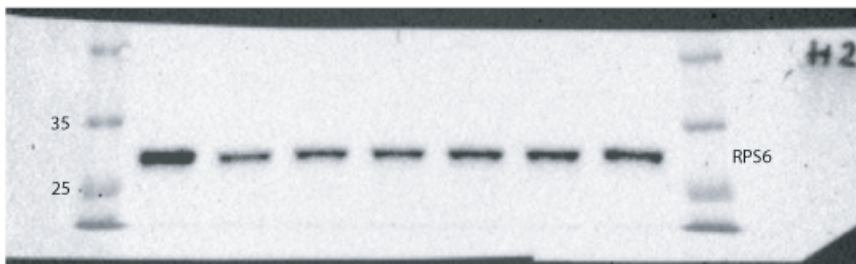

RPS6

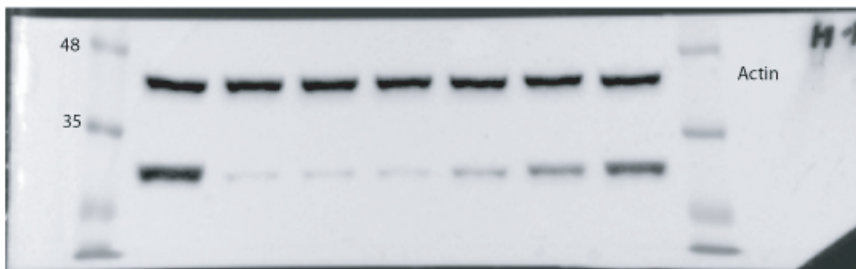

Actin

**Figure 5C**

Samples loaded:

U2OS: +AA -MnCl<sub>2</sub>; -AA -MnCl<sub>2</sub>; -AA +MnCl<sub>2</sub>

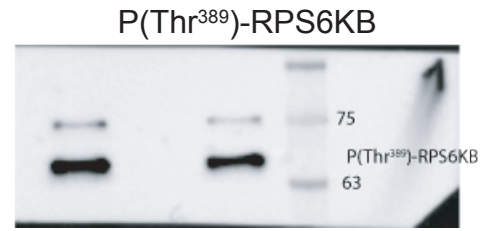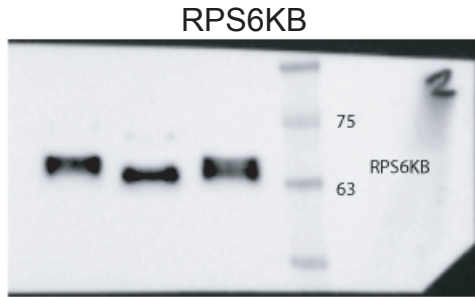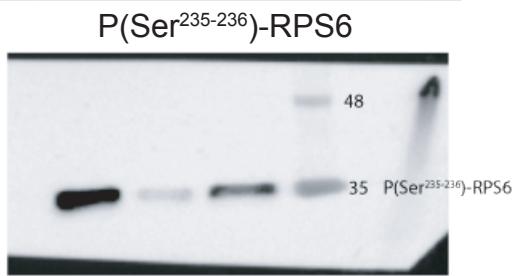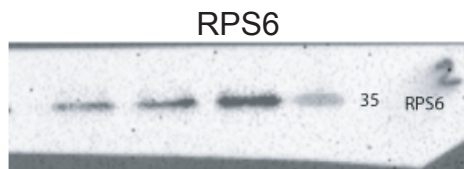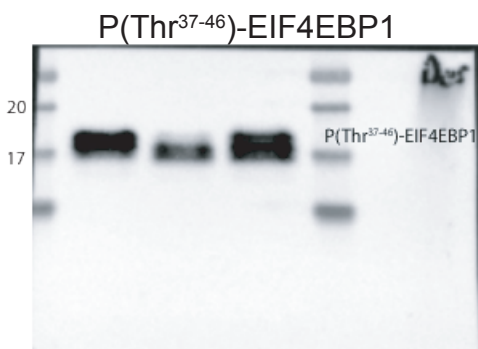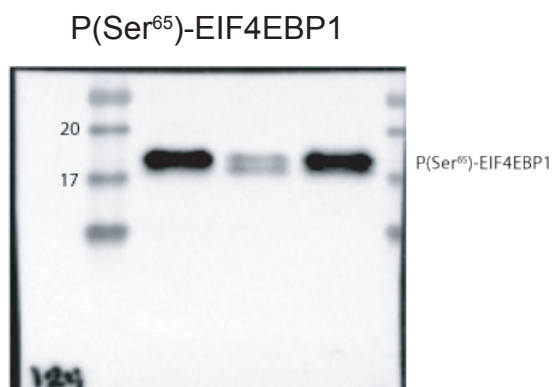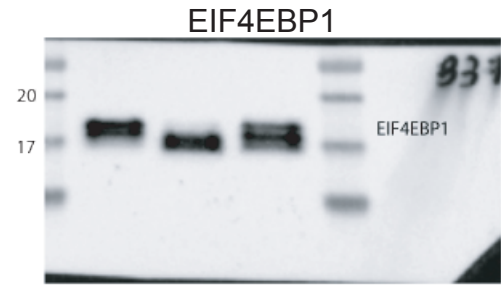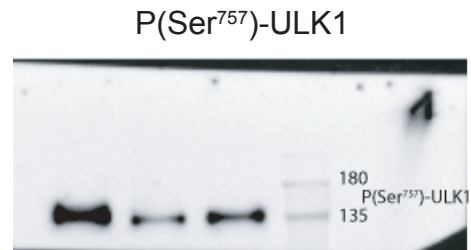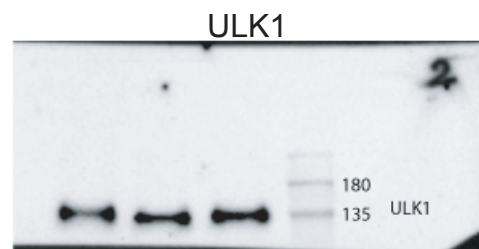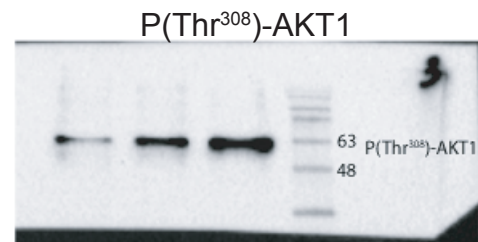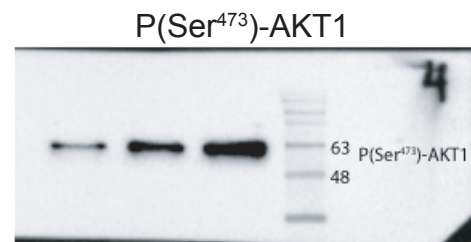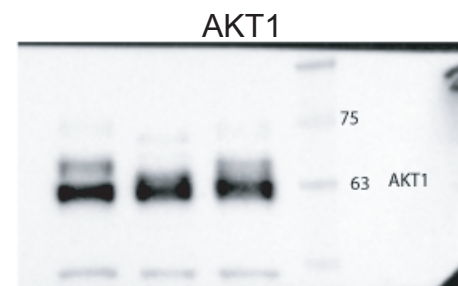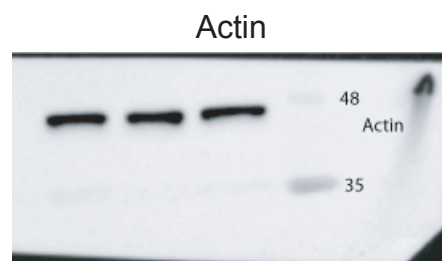

### Figure 5D

Samples loaded:

U2OS: +AA -MnCl<sub>2</sub>; -AA -MnCl<sub>2</sub>; -AA +MnCl<sub>2</sub>

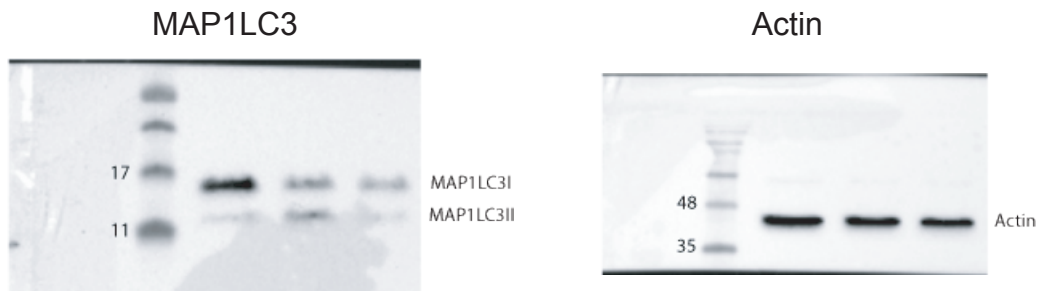

### Figure 5E

Samples loaded:

U2OS: +AA -MnCl<sub>2</sub>+CQ; -AA -MnCl<sub>2</sub>+CQ; -AA +MnCl<sub>2</sub>+CQ

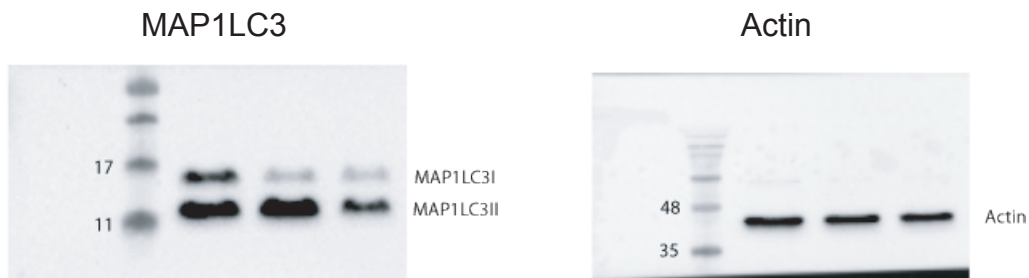

Supplement: elife-80497-fig5-data2.pdf [file elife-80497-fig5-data2.pdf]
