# Supplementary material for: Manganese is a physiologically relevant TORC1 activator in yeast and mammals
Source: PubMed Central journal article supplement (PMC9337852; doi:10.7554/elife.80497), 2022-07-29

Figure 1E

Data shown in Figure 1E correspond to Expt2.

| Expt 2               |    |              |              | Expt 1             |    |              |              |                    |
|----------------------|----|--------------|--------------|--------------------|----|--------------|--------------|--------------------|
|                      | WT | <i>pur1Δ</i> | <i>sur2Δ</i> | <i>pur1Δ sur2Δ</i> | WT | <i>pur1Δ</i> | <i>sur2Δ</i> | <i>pur1Δ sur2Δ</i> |
| MnCl <sub>2</sub>    | -  | -            | -            | -                  | -  | +            | -            | -                  |
| CaCl <sub>2</sub> MW | -  | +            | -            | +                  | -  | +            | -            | +                  |

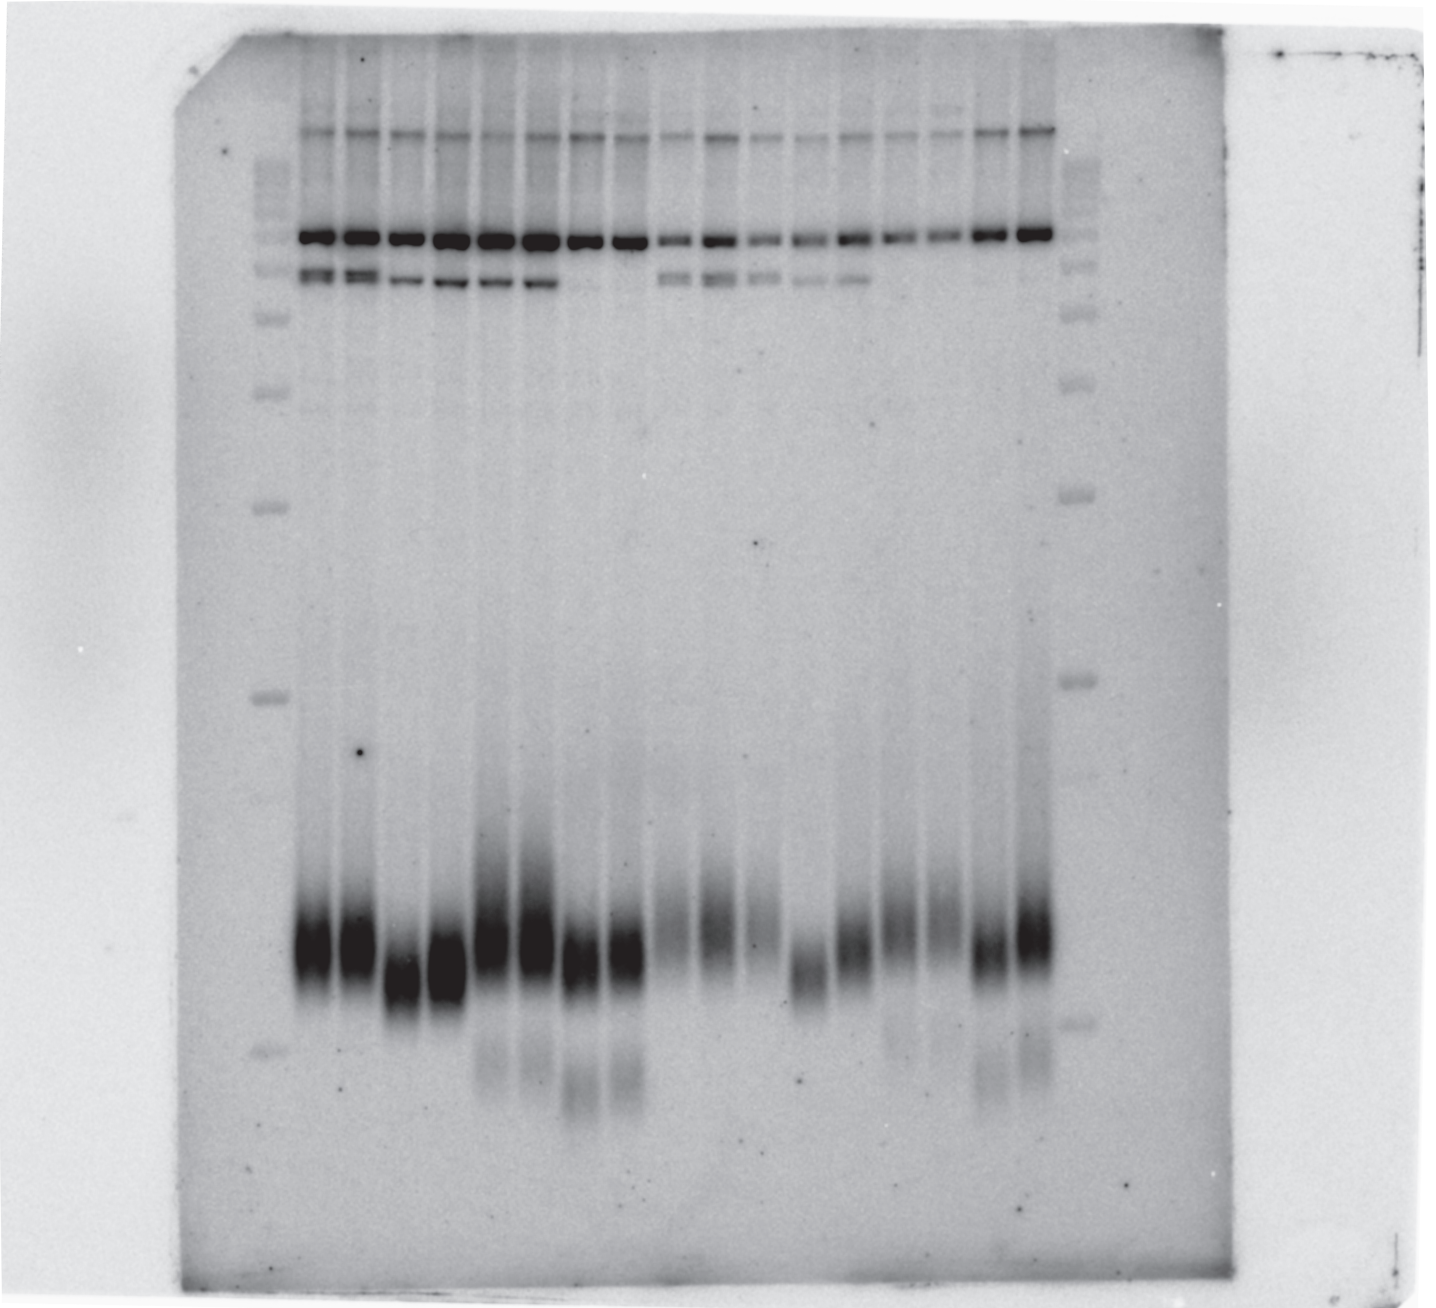

Supplement: elife-80497-fig1-data1.pdf [file elife-80497-fig1-data1.pdf]
