# Supplementary material for: Manganese is a physiologically relevant TORC1 activator in yeast and mammals
Source: PubMed Central journal article supplement (PMC9337852; doi:10.7554/elife.80497), 2022-07-29

### Figure 1-Figure Supplement 1C

Samples loaded:

WT *GFP-TOR1* 0, 0.5, 1, 2 h RAP treatment; *pmr1* $\Delta$  *GFP-TOR1* 0, 0.5, 1, 2 h RAP treatment; *bsd2* $\Delta$  *GFP-TOR1* 0, 0.5, 1, 2 h RAP treatment; *pmr1* $\Delta$  *bsd2* $\Delta$  *GFP-TOR1* 0, 0.5, 1, 2 h RAP treatment. Samples highlighted in blue are those shown in Figure 1-Figure supplement 1.

anti-GFP

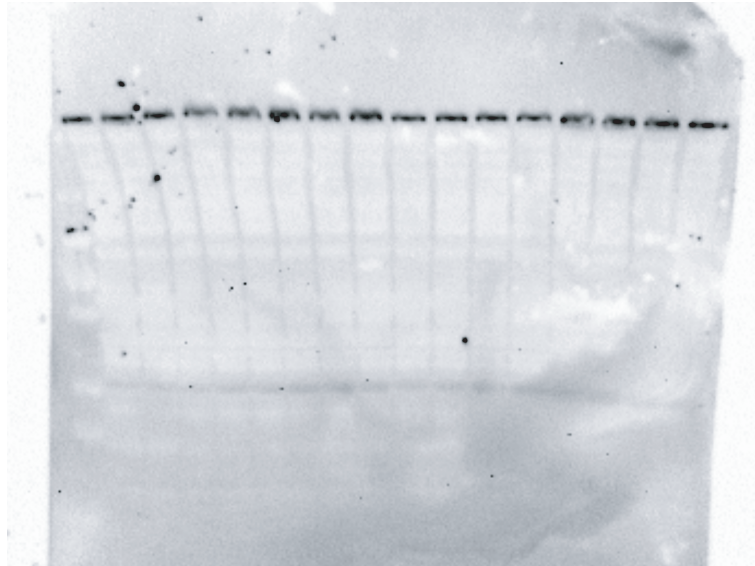

anti-G-6-PDH

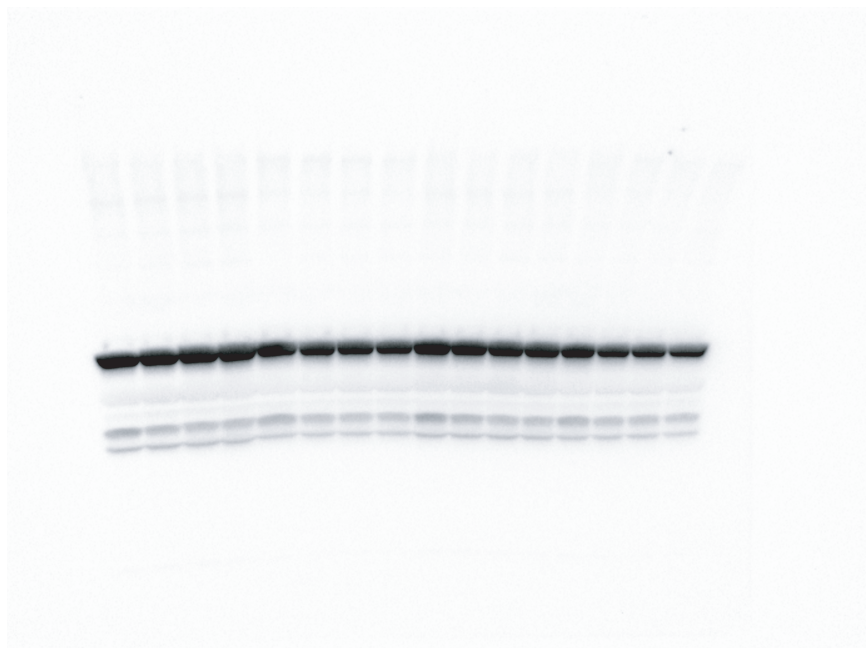

Supplement: elife-80497-fig1-figsupp1-data1.pdf [file elife-80497-fig1-figsupp1-data1.pdf]
