# Supplementary material for: Manganese is a physiologically relevant TORC1 activator in yeast and mammals
Source: PubMed Central journal article supplement (PMC9337852; doi:10.7554/elife.80497), 2022-07-29

**Figure 4A**  
**EXPT1, 2, 3**

Samples loaded:

0, 0.5, 1 and 2h RAP treatment; 0, 0.5, 1 and 2h CHX treatment; 0, 0.5, 1 and 2h RAP and CHX treatment; 0h no treatment

The blots shown in Figure 4A correspond to Expt 3.

anti-GFP

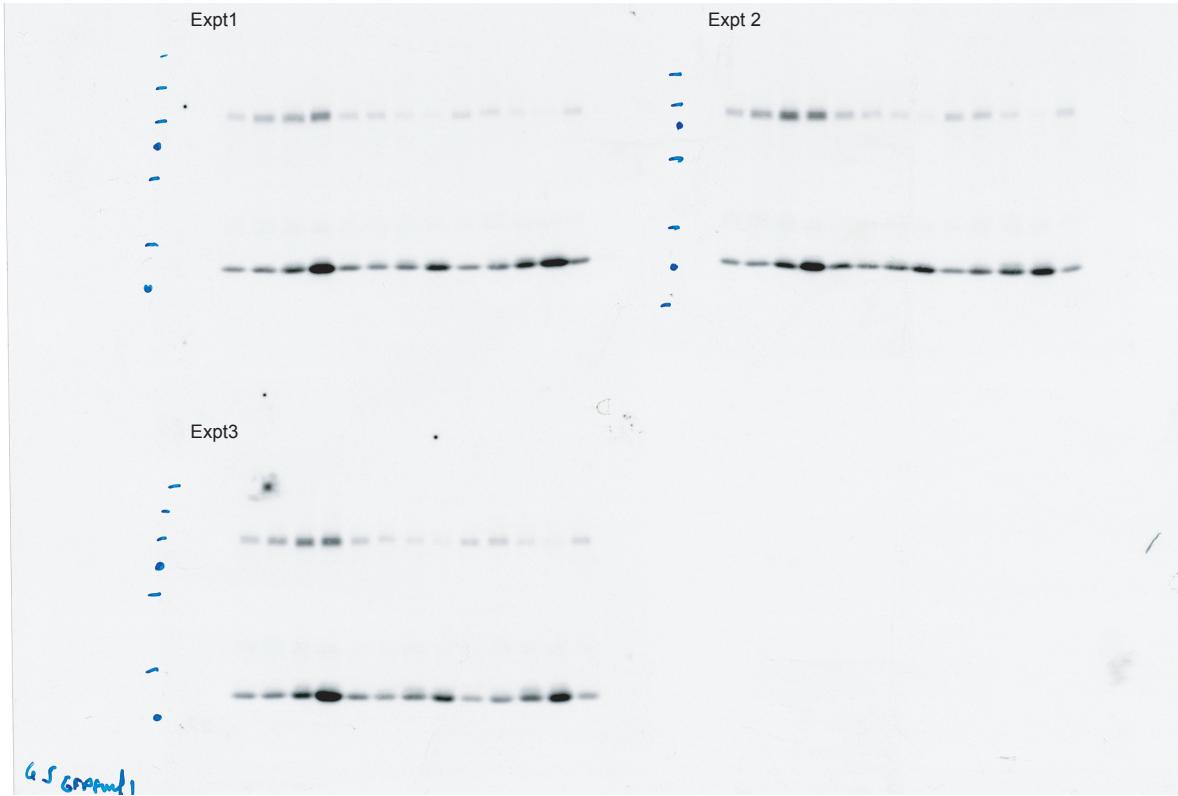

anti-Adh1

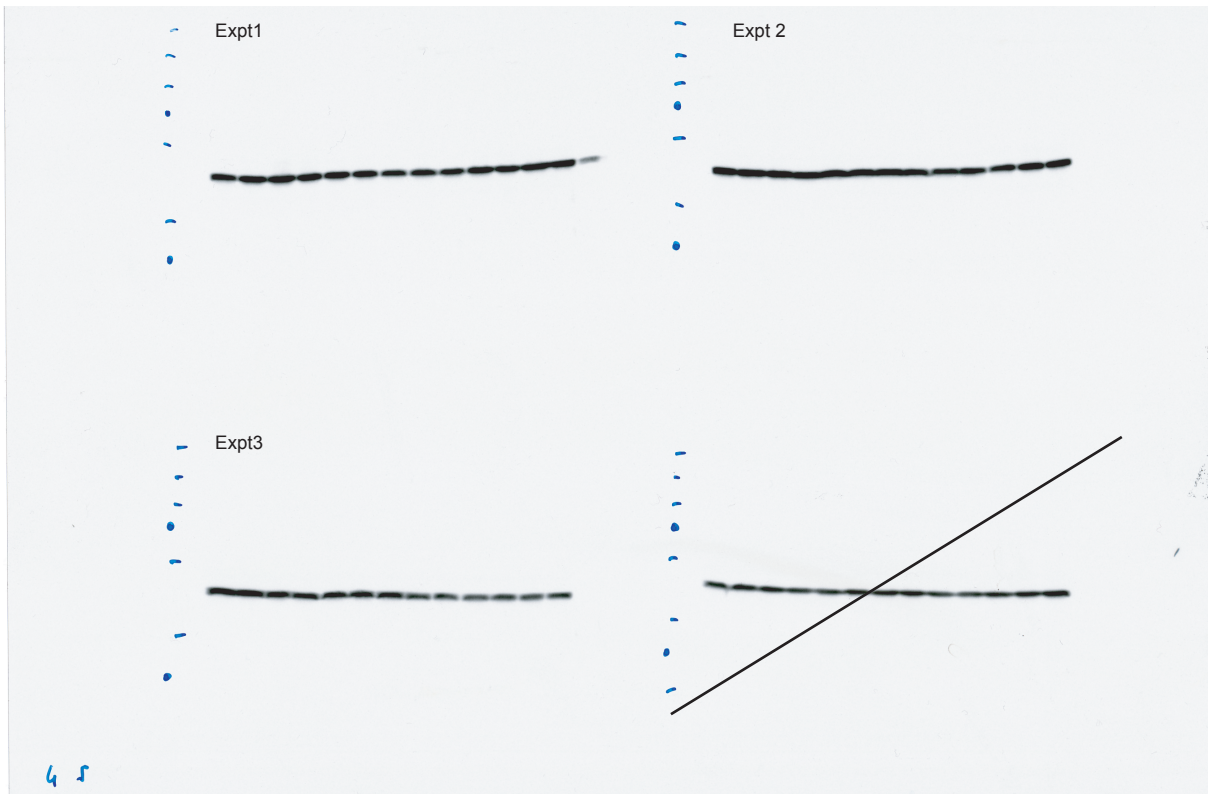

**Figure 4D**  
**EXPT1, 2, 3**

Samples loaded:

0, 0.5, 1 and 2h RAP treatment; 0, 0.5, 1 and 2h CHX treatment; 0, 0.5, 1 and 2h RAP and CHX treatment; 0h no treatment

The blots shown in Figure 4D correspond to Expt 3.

anti-GFP

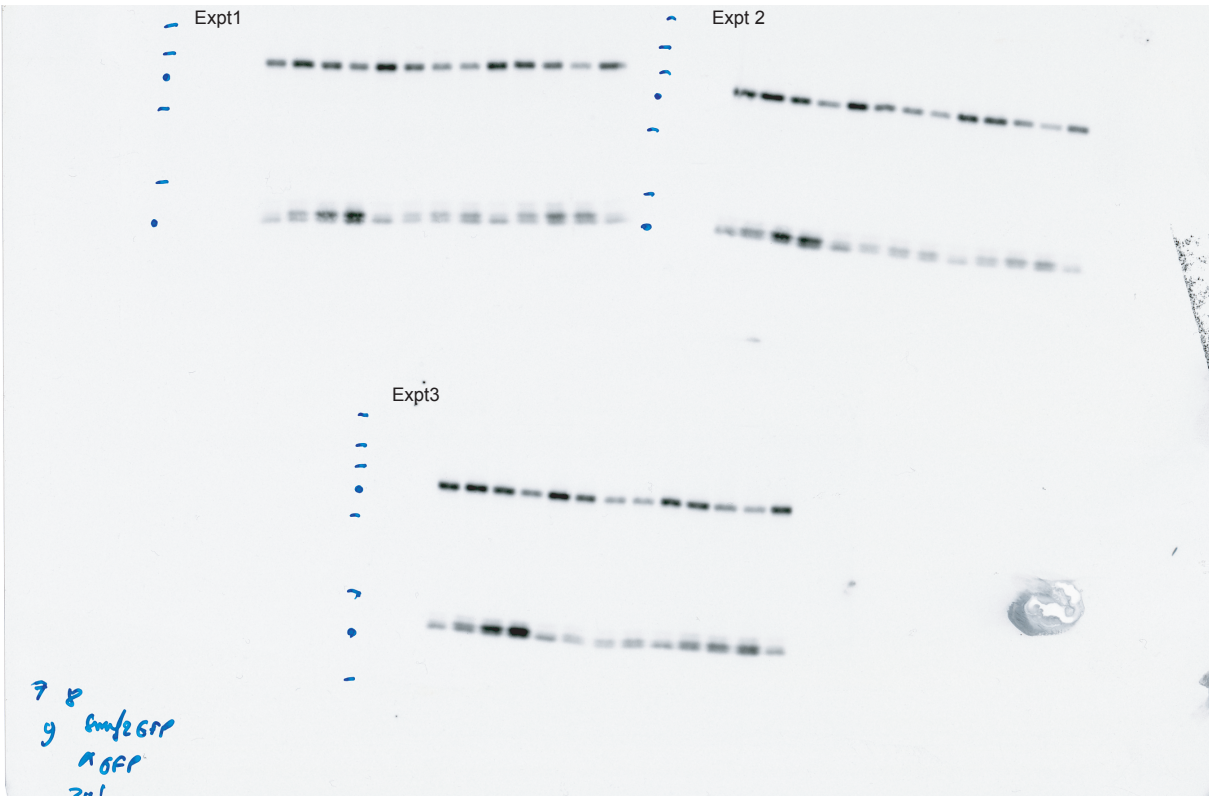

anti-Adh1

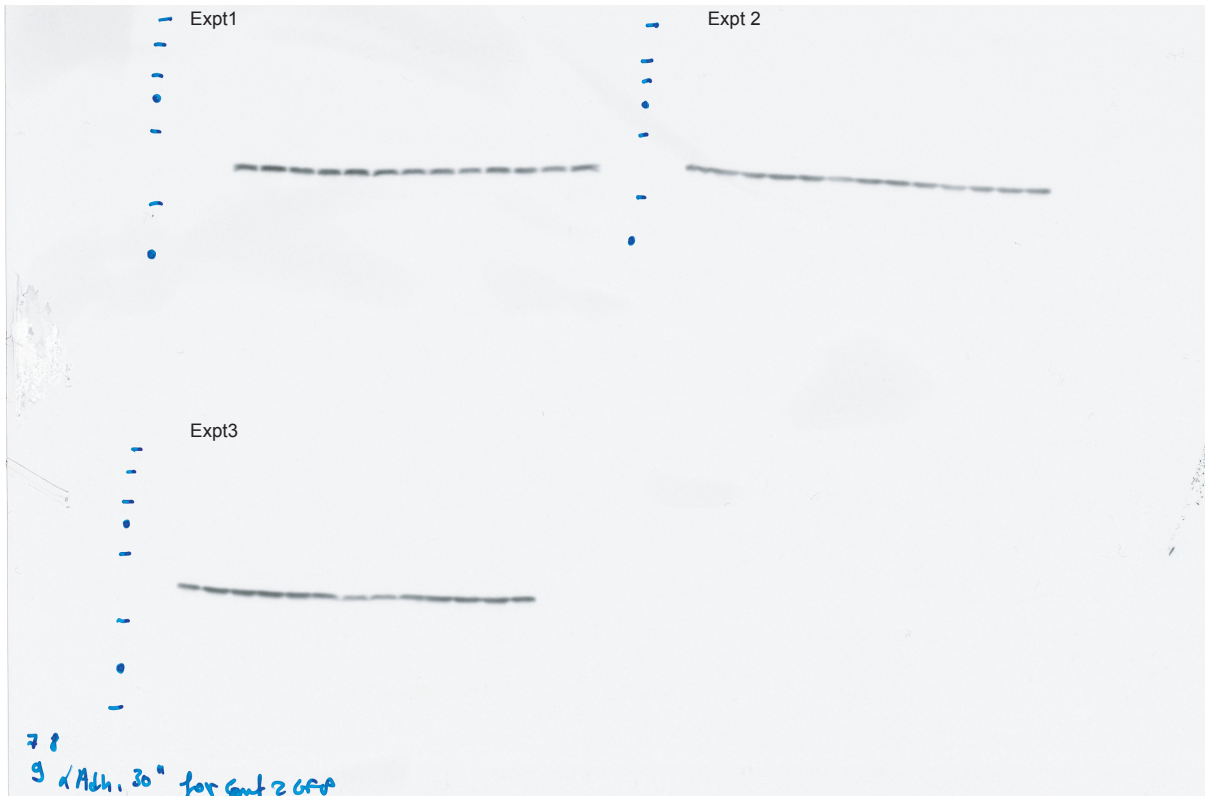

Supplement: elife-80497-fig4-data2.pdf [file elife-80497-fig4-data2.pdf]
