# Supplementary material for: Manganese is a physiologically relevant TORC1 activator in yeast and mammals
Source: eLife journal article supplement (doi:10.7554/elife.80497), 2022-07-19
Supplement: fig3-data3 [file Figure 3A_loading.xlsx]

## Sheet: Sheet1
Figure 3A loading
Replica 1
MgCl2 (µM)						MnCl2 (µM)
640	320	160	80	40	20	640	320	160	80	40	20
Replica 2
MgCl2 (µM)						MnCl2 (µM)
640	320	160	80	40	20	640	320	160	80	40	20
Replica 3
MgCl2 (µM)						MnCl2 (µM)
20	40	80	160	320	640	20	40	80	160	320	640
