# Supplementary material for: Manganese is a physiologically relevant TORC1 activator in yeast and mammals
Source: eLife journal article supplement (doi:10.7554/elife.80497), 2022-07-19
Supplement: fig3-data3 [file Figure 3C_loading.xlsx]

## Sheet: Sheet1
Figure 3C loading
Replica 1
MgCl2 4 mM, ATP (µM)					MnCl2 0.16 mM, ATP (µM)					MgCl2 4 mM, MnCl2 0.16 mM, ATP (µM)
1.2	3.6	11	33	100	1.2	3.6	11	33	100	1.2	3.6	11	33	100
Replica 2
MgCl2 4 mM, ATP (µM)					MnCl2 0.16 mM, ATP (µM)					MgCl2 4 mM, MnCl2 0.16 mM, ATP (µM)
1.2	3.6	11	33	100	1.2	3.6	11	33	100	1.2	3.6	11	33	100
Replica 3
MgCl2 4 mM, MnCl2 0.16 mM, ATP (µM)					MnCl2 0.16 mM, ATP (µM)					MgCl2 4 mM, ATP (µM)
1.2	3.6	11	33	100	1.2	3.6	11	33	100	1.2	3.6	11	33	100
Replica 4
MgCl2 4 mM, ATP (µM)							MnCl2 4 mM, ATP (µM)
1.2	3.6	11	33	100	300 (not quantified)	600 (not quantified)	1.2	3.6	11	33	100	300 (not quantified)	600 (not quantified)
