# Supplementary material for: Manganese is a physiologically relevant TORC1 activator in yeast and mammals
Source: eLife. 2022 Jul 29;11:e80497. doi: 10.7554/eLife.80497 (PMC9337852; doi:10.7554/eLife.80497)
Supplement: Figure 2—source data 1. [file elife-80497-fig2-data1.xlsx]

## Sheet: Figure 2 A-B
Figure 2 A-B. Quantification of blots obtained with cells expressing GFP-Atg8
Expt1	WT					pmr1∆
RAP [h]	0	1	2	4	6	0	1	2	4	6
GFP-Atg8	229177	196040	253539	324493	319800	35412	58019	82108	110936	105896
GFP	59163	56667	222274	609414	874705	500	7189	12714	125510	272482
Total	288340	252707	475813	933907	1194505	35912	65208	94822	236446	378378
Total normalized to WT					100					31.6766
*GFP/Total*100					73.2274					72.0132
Expt2	WT					pmr1∆					smf2∆					pmr1∆ smf2∆
RAP [h]	0	1	2	4	6	0	1	2	4	6	0	1	2	4	6	0	1	2	4	6
GFP-Atg8	2811700	2569117	2723260	3108621	2721629	945453	1244115	1660872	1861604	1793757	1134614	1652204	2358342	3316290	3557950	1672647	1990614	1949211	2096793	2061046
GFP	861894	918619	1967006	4530857	5504529	350964	338606	1013862	2375097	2919515	142351	287837	1709410	4383879	5698229	417733	1077545	2383127	4663011	5234969
Total	3673594	3487736	4690266	7639478	8226158	1296417	1582721	2674734	4236701	4713272	1276965	1940041	4067752	7700169	9256179	2090380	3068159	4332338	6759804	7296015
Total normalized to WT					100					57.2962					112.521					88.6929
*GFP/Total*100					66.9149					61.9424					61.5614					71.7511
Expt3	WT				pmr1∆				smf2∆				pmr1∆ smf2∆				smf2∆ bis				pmr1∆ smf2∆ bis
RAP [h]	0	2	4	6	0	2	4	6	0	2	4	6	0	2	4	6	0	2	4	6	0	2	4	6
GFP-Atg8	4.11293e+06	1.51473e+07	25400997	2.74885e+07	2.11556e+06	6.92273e+06	7.52919e+06	7.60899e+06	2.43783e+06	9.43817e+06	1.33127e+07	1.6214e+07	1.53567e+06	6.68731e+06	8.54561e+06	9675237	3.27389e+06	1.44839e+07	1.79224e+07	21931382	2.3388e+06	6.9931e+06	6.53893e+06	6.53743e+06
GFP	22496.9	6.46892e+06	35349121	5.15299e+07	230249	2.57272e+06	1.23034e+07	2.10885e+07	19485.1	4.91325e+06	2.78184e+07	5.46369e+07	183421	1.86891e+06	1.39716e+07	2.7057e+07	131219	6.96133e+06	3.35785e+07	57165207	671397	3.62691e+06	1.80837e+07	3.0697e+07
Total	4.13543e+06	2.16162e+07	60750118	7.90183e+07	2.34581e+06	9495445	1.98325e+07	2.86975e+07	2.45732e+06	1.43514e+07	4.11311e+07	7.08509e+07	1.71909e+06	8.55622e+06	2.25173e+07	3.67322e+07	3.4051e+06	2.14452e+07	5.15009e+07	79096589	3.01019e+06	1.062e+07	2.46226e+07	3.72345e+07
Total normalized to WT				100				36.3175				89.6639				46.4857				100.099				47.1213
*GFP/Total*100				65.2125				73.4855				77.1153				73.6601				72.2727				82.4425
Expt4	WT				pmr1∆				smf2∆				pmr1∆ smf2∆
RAP [h]	0	2	4	6	0	2	4	6	0	2	4	6	0	2	4	6
GFP-Atg8	1.33912e+07	1.21109e+07	1.28653e+07	13382057	1.40329e+06	2.67535e+06	3.48438e+06	3.38192e+06	1.88203e+06	4.84594e+06	5.96088e+06	8.22461e+06	2.83825e+06	3.90925e+06	4636573	4.58659e+06
GFP	4.79021e+06	7.23755e+06	1.4315e+07	20281324	1.73277e+06	2.23422e+06	6.65585e+06	8084181	362791	2.57817e+06	7.4691e+06	1.96337e+07	622807	4142962	9.83596e+06	1.44619e+07
Total	1.81814e+07	1.93484e+07	2.71803e+07	33663381	3.13606e+06	4.90957e+06	1.01402e+07	1.14661e+07	2.24482e+06	7.42412e+06	1.343e+07	2.78583e+07	3.46106e+06	8.05222e+06	1.44725e+07	1.90485e+07
Total normalized to WT				100				34.0611				82.7554				56.5852
*GFP/Total*100				60.2474				70.505				70.4769				75.9215
GFP-Atg8+*GFP normalized to WT (6h RAP)							*GFP [%] (6h RAP)
	WT	pmr1∆	smf2∆	pmr1∆ smf2∆				WT	pmr1∆	smf2∆	pmr1∆ smf2∆
	100	31.6766	100.099	47.1213				73.2274	72.0132	72.2727	82.4425
	100	57.2962	112.521	88.6929				66.9149	61.9424	61.5614	71.7511
	100	36.3175	89.6639	46.4857				65.2125	73.4855	77.1153	73.6601
	100	34.0611	82.7554	56.5852				60.2474	70.505	70.4769	75.9215
Mean	100	39.84	96.26	59.72			Mean	66.4	69.49	70.36	75.94
SEM	0	5.896	6.487	9.929			SEM	2.679	2.587	3.25	2.328

## Sheet: Figure 2 C-D
Figure 2 C-D. Quantification of blots obtained with cells expressing Om45-GFP
Expt1	WT					pmr1∆
RAP [h]	0	1	2	4	6	0	1	2	4	6
Om45-GFP	41258	209790	438396	1143436	1414490	92391	296940	272352	594737	536788
GFP	3000	9345	4956	50134	207088	3000	2170	3084	7501	9814
Total	44258	219135	443352	1193570	1621578	95391	299110	275436	602238	546602
Total normalized to WT					100					33.708
*GFP/Total*100					12.7708					1.79546
Expt2	WT					pmr1∆					smf2∆					pmr1∆ smf2∆
RAP [h]	0	1	2	4	6	0	1	2	4	6	0	1	2	4	6	0	1	2	4	6
OM45-GFP	364635	606872	1250310	1850070	2105985	285480	653460	1248045	1907730	2028480	293244	710010	1282554	2085705	2276535	677068	1276155	1876995	2388810	2548830
GFP	4665	4270	6615	69885	268140	5025	6750	3345	9690	51330	4564	4788	5460	121770	332535	6342	14145	76575	433710	753060
Total	369300	611142	1256925	1919955	2374125	290505	660210	1251390	1917420	2079810	297808	714798	1288014	2207475	2609070	683410	1290300	1953570	2822520	3301890
Total normalized to WT					100					87.6032					109.896					139.078
*GFP/Total*100					11.2943					2.46801					12.7453					22.8069
Expt3	WT				pmr1∆				smf2∆				pmr1∆ smf2∆				smf2∆ bis				pmr1∆ smf2∆ bis
RAP [h]	0	2	4	6	0	2	4	6	0	2	4	6	0	2	4	6	0	2	4	6	0	2	4	6
OM45-GFP	5.48204e+06	2.89277e+07	3.63612e+07	4.65562e+07	994101	1.31735e+07	2.48954e+07	2.91277e+07	5.75648e+06	3.11734e+07	45625058	47605973	1.58382e+06	2.91506e+07	4.04425e+07	4.75147e+07	4.13339e+06	2.7731e+07	3.35533e+07	35437050	4.16325e+06	23457186	32235179	43340630
GFP	3053.62	227.5	521865	3.97272e+06	12577.8	933	8205.5	1.27619e+06	1113	227.5	668762	6.30009e+06	16190.2	648.5	510241	6.37217e+06	2779.25	601.5	1.16137e+06	6.35849e+06	32844.4	9361.5	1.04529e+06	7.83365e+06
Total	5.48509e+06	2.89279e+07	3.6883e+07	5.05289e+07	1.00668e+06	1.31744e+07	2.49037e+07	3.04039e+07	5.75759e+06	3.11736e+07	46293820	5.39061e+07	1.60001e+06	2.91513e+07	4.09527e+07	5.38868e+07	4.13617e+06	2.77316e+07	3.47147e+07	4.17955e+07	4.19609e+06	2.34665e+07	3.32805e+07	5.11743e+07
Total normalized to WT				100				60.1712				106.684				106.646				82.7161				101.277
*GFP/Total*100				7.86227				4.19746				11.6872				11.8251				15.2133				15.3078
Om45-GFP+*GFP normalized to WT (6h RAP)							*GFP [%] (6h RAP)
	WT	pmr1∆	smf2∆	pmr1∆ smf2∆				WT	pmr1∆	smf2∆	pmr1∆ smf2∆
	100	33.708	82.7161	101.277				12.7708	1.79546	15.2133	15.3078
	100	87.6032	109.896	139.078				11.2943	2.46801	12.7453	22.8069
	100	60.1712	106.684	106.646				7.86227	4.19746	11.6872	11.8251
Mean	100	60.49	99.77	115.7			Mean	10.64	2.82	13.22	16.65
SEM	0	15.56	8.575	11.81			SEM	1.454	0.7154	1.045	3.24

## Sheet: Figure 2 F-G
Figure 2 F-G. Quantification of blots obtained with cells expressing Rtg3-GFP
Expt1	WT			pmr1∆			smf2∆			pmr1∆ smf2∆
RAP [min]	0	15	30	0	15	30	0	15	30	0	15	30			Rtg3-GFP normalized to WT 15 min treatment
Rtg3-GFP	1.34201e+06	5.77684e+06	3.73244e+06	264560	1.91657e+06	1.45454e+06	2.0766e+06	4.31105e+06	4.43448e+06	3.01222e+06	3.99634e+06	3.61815e+06
																WT			pmr1∆			smf2∆			pmr1∆ smf2∆
Normalized to WT 15 min																0	15	30	0	15	30	0	15	30	0	15	30
	23.2308	100	64.6105	4.57967	33.1768	25.1788	35.947	74.6264	76.7631	52.1431	69.1786	62.632			Expt1	23.2308	100	64.6105	4.57967	33.1768	25.1788	35.947	74.6264	76.7631	52.1431	69.1786	62.632
															Expt2	46.2454	100	86.4835	14.9983	26.257	27.3665	26.6769	80.6956	67.4276	14.0827	33.8655	33.8035
															Expt3	43.5487	100	76.6035	27.8185	37.957	38.0377	49.4031	102.565	128.597	50.7039	70.4002	41.7217
															Expt 4	28.8078	100	147.48	41.0406	41.157	44.0446	58.5898	157.279	141.493	29.9174	148.084	97.7983
Expt2	WT			pmr1∆			smf2∆			pmr1∆ smf2∆					Mean	35.425	100	93.8	22.1	34.675	33.65	42.65	103.8	103.575	36.7	80.4	58.975
RAP [min]	0	15	30	0	15	30	0	15	30	0	15	30			SEM	5.58754	0	18.4514	7.88649	3.2397	4.4395	7.07066	18.8192	18.4619	9.08369	24.1022	14.2966
Rtg3-GFP	1.70284e+06	3.68217e+06	3.18447e+06	552265	966829	1.00768e+06	982291	2.97135e+06	2482800	518548	1.24699e+06	1.2447e+06
Normalized to WT 15 min
	46.2454	100	86.4835	14.9983	26.257	27.3665	26.6769	80.6956	67.4276	14.0827	33.8655	33.8035
Expt3	WT			pmr1∆			smf2∆			pmr1∆ smf2∆
RAP [min]	0	15	30	0	15	30	0	15	30	0	15	30
Rtg3-GFP	2.35857e+07	5.41594e+07	41488017	1.50664e+07	2.05573e+07	20600978	2.67565e+07	5.55486e+07	6.96475e+07	2.7461e+07	3.81283e+07	2.25962e+07
Normalized to WT 15 min
	43.5487	100	76.6035	27.8185	37.957	38.0377	49.4031	102.565	128.597	50.7039	70.4002	41.7217
Expt4	WT			pmr1∆			smf2∆			pmr1∆ smf2∆
RAP [min]	0	15	30	0	15	30	0	15	30	0	15	30
Rtg3-GFP	4.94817e+06	1.71765e+07	2.53319e+07	7.04933e+06	7069322	7.56532e+06	1.00637e+07	2.70151e+07	2.43036e+07	5.13877e+06	2.54356e+07	1.67983e+07
Normalized to WT 15 min
	28.8078	100	147.48	41.0406	41.157	44.0446	58.5898	157.279	141.493	29.9174	148.084	97.7983
