# Supplementary material for: Manganese is a physiologically relevant TORC1 activator in yeast and mammals
Source: eLife. 2022 Jul 29;11:e80497. doi: 10.7554/eLife.80497 (PMC9337852; doi:10.7554/eLife.80497)
Supplement: Figure 3—source data 1. [file elife-80497-fig3-data1.xlsx]

## Sheet: Figure 3 A-B
Figure 3 A-B. Relative TORC1 activity (scaled on the MnCl2 640 µM samples)
	Ion [µM]	MgCl2			MnCl2
		Expt1	Expt2	Expt3	Expt1	Expt2	Expt3
	640	0.641242	0.399887	0.185085	1	1	1
	320	0.369948	0.257059	0.113316	1.03054	1.12247	1.04924
	160	0.233272	0.14743	0.0355632	1.00788	1.16242	0.629851
	80	0.184465	0.0726746	0.0283104	0.971594	0.760705	0.287844
	40	0.0798759	0.0298776	0.0200891	1.03118	0.556846	0.116291
	20	0	0.0285196	0.0189813	0.940569	0.302303	0.0344202

## Sheet: Figure 3 C-D
Figure 3 C-D. Relative TORC1 activity (scaled on the MnCl2 0.16 mM, ATP 10 µM samples)
	ATP [µM]	MgCl2 4 mM				MnCl2 0,16 mM				MgCl2 4 mM MnCl2 0.16 mM
		Expt1	Expt2	Expt3	Expt4	Expt1	Expt2	Expt3	Expt4	Expt1	Expt2	Expt3
	1.2	0.0388521	0.0106749	0.00985134	0.016647	0.231865	0.144444	0.127049	0.129672	0.0706478	0.0576438	0.0229159
	3.6	0.051919	0.0273775	0.0295906	0.033157	0.412722	0.245162	0.272941	0.239201	0.0920716	0.104851	0.0705835
	11	0.0740706	0.0664928	0.0837384	0.0880459	0.638553	0.52664	0.574935	0.55911	0.23717	0.256471	0.148008
	33	0.15309	0.187292	0.168684	0.246761	0.990156	0.872792	0.987126	0.938871	0.462057	0.515345	0.320308
	100	0.240916	0.267477	0.291268	0.453794	1	1	1	1	0.775708	0.793987	0.427485
