# Supplementary material for: Manganese is a physiologically relevant TORC1 activator in yeast and mammals
Source: eLife. 2022 Jul 29;11:e80497. doi: 10.7554/eLife.80497 (PMC9337852; doi:10.7554/eLife.80497)
Supplement: Figure 4—source data 1. [file elife-80497-fig4-data1.xlsx]

## Sheet: Figure 4 A-B
Figure 4 A-B. Quantification of blots obtained with cells expressing GFP-Smf1.
Expt1	time	GFP-Smf1	free GFP	GFP-Smf1/(total GFP)*100			Time	RAP			CHX			RAP and CHX
RAP	0	2934.69	3412.64	46.235				Mean	SEM	N	Mean	SEM	N	Mean	SEM	N
	30	8165.29	5280.12	60.7292			0	47.96	1.48177	3	35.13	0.255799	3	42.57	3.44123	3
	60	11058.5	10320.1	51.7269			30	60.8967	2.34552	3	33.4333	3.42793	3	32.8633	4.38465	3
	120	19251.7	21547	47.1871			60	57.0633	2.94631	3	14.66	1.4888	3	9.21	0.299555	3
CHX	0	2834.45	5328.83	34.7219			120	45.4	1.26769	3	4.02333	0.104934	3	3.33333	0.687637	3
	30	2734.15	4060.71	40.2385
	60	1127.16	5739.44	16.4151
	120	499.435	11730.9	4.08358
RAP and CHX	0	2215.67	3944.35	35.9686
	30	1944.13	5497.66	26.1245
	60	1059.16	11213.7	8.63012
	120	887.335	19178	4.42224
Expt2	time	GFP-Smf1	free GFP	GFP-Smf1/(total GFP)*100
RAP	0	3587.18	3458.76	50.9113
	30	8714.29	4683.71	65.0417
	60	18419.2	11336.6	61.9011
	120	16647.4	19493.9	46.062
CHX	0	4481.37	8105.32	35.604
	30	2333.55	5257.54	30.7406
	60	1457.58	7731.39	15.8623
	120	469.263	11806.3	3.82273
RAP and CHX	0	3450.18	4358.47	44.1841
	30	3479.35	7608.44	31.38
	60	1153.58	10824.5	9.63071
	120	553.435	15151.5	3.52396
Expt3	time	GFP-Smf1	free GFP	GFP-Smf1/(total GFP)*100
RAP	0	3530.47	4025	46.7273
	30	7378.17	5583.9	56.9212
	60	15099.7	11131.8	57.5631
	120	18583.5	24685.6	42.9486
CHX	0	3168.52	5865.2	35.0744
	30	1590.65	3834	29.3226
	60	1018.75	7686.05	11.7033
	120	481.849	11073.7	4.16987
RAP and CHX	0	2400.62	2646.81	47.5612
	30	3277.76	4698.37	41.0946
	60	971.163	9390.53	9.37263
	120	374.435	17833.6	2.05642

## Sheet: Figure 4 D-E
Figure 4 D-E. Quantification of blots obtained with cells expressing Smf2-GFP.
Expt1	time	Smf2-GFP	free GFP	Smf2-GFP/(total GFP)*100			Time	RAP			CHX			RAP and CHX
RAP	0	7873.97	2146.67	78.5775				Mean	SEM	N	Mean	SEM	N	Mean	SEM	N
	30	13545.7	5637.78	70.6113			0	75.0433	3.58176	3	73.8633	3.14813	3	77.7867	3.19109	3
	60	10962.2	12967.6	45.8097			30	64.26	3.28573	3	72.6467	3.31252	3	66.1633	5.29157	3
	120	7274.85	22736.9	24.24			60	40.33	3.06784	3	56.63	2.50406	3	42.1833	3.04564	3
CHX	0	15920.5	4388.07	78.393			120	21.3733	1.68367	3	41.65	1.10437	3	24.9333	1.58216	3
	30	9414.51	2861.2	76.6922
	60	5540.61	4537	54.9794
	120	5014.07	7621.51	39.6822
RAP and CHX	0	13545.1	4245.37	76.1369
	30	12030.3	5712.32	67.8045
	60	8680.51	11203.9	43.6548
	120	3665.88	9569.89	27.6968
Expt2	time	Smf2-GFP	free GFP	Smf2-GFP/(total GFP)*100
RAP	0	10987.7	5198.97	67.8812
	30	15316.9	10373.4	59.6214
	60	10520.1	19364.8	35.2021
	120	4934.42	21872.9	18.407
CHX	0	13041.2	6189.8	67.8134
	30	7011.61	3598.45	66.0846
	60	5184.12	4531.42	53.3591
	120	3152.93	4394.88	41.7728
RAP and CHX	0	10376.2	1984.13	83.9476
	30	10586.5	3642.69	74.3999
	60	4809.42	5517.27	46.5727
	120	2126.33	6421.1	24.8768
Expt3	time	Smf2-GFP	free GFP	Smf2-GFP/(total GFP)*100
RAP	0	13243.4	3590.42	78.6714
	30	15893.1	9514.51	62.5525
	60	12371.9	18569.7	39.9846
	120	6404.2	23420.1	21.4731
CHX	0	15491	5056.73	75.3903
	30	9175.97	3031.45	75.1672
	60	4011.71	2505.79	61.5529
	120	3711.88	4821.59	43.4979
RAP and CHX	0	11559.8	4216.49	73.2732
	30	11467	8905.05	56.288
	60	6117.61	10723	36.3265
	120	3886.3	13606.6	22.2164
