# Supplementary material for: Manganese is a physiologically relevant TORC1 activator in yeast and mammals
Source: eLife. 2022 Jul 29;11:e80497. doi: 10.7554/eLife.80497 (PMC9337852; doi:10.7554/eLife.80497)
Supplement: Figure 5—source data 1. [file elife-80497-fig5-data1.xlsx]

## Sheet: Figure 5 F-G
Figure 5 F-G
	Granules	Cells	Granules/cell
U2OS -AA S2 -4	269	13	20.6923			% aggregates	SD
U2OS -AA S2 -5	384	16	24		U-AA	100	8.62875
U2OS -AA S2 -6	291	14	20.7857		U+Mn	38.9097	3.01136
Mean			21.826		U+AA	34.9736	12.3819
SD			1.88331
U2OS +Mn S2 -7	96	11	8.72727
U2OS +Mn S2 -8	63	7	9
U2OS +Mn S2 -9	62	8	7.75
Mean			8.49242
SD			0.65726
U2OS +AA S2 -12	104	10	10.4
U2OS +AA S2 -13	50	10	5
U2OS +AA S2 -14	75	10	7.5
Mean			7.63333
SD			2.70247
